# Supplementary material for: Mixed cytomegalovirus genotypes in HIV-positive mothers show compartmentalization and distinct patterns of transmission to infants
Source: eLife journal article supplement (doi:10.7554/elife.63199), 2020-12-31
Supplement: supp [file elife-63199-supp-v1.zip]

Archive with 10 entries (10 files):
- elife_poa_e63199_Transparent_Reporting_File.pdf
- elife_poa_e63199_Figure_1_figure_supplement_1.pdf
- elife_poa_e63199_Figure_2_figure_supplement_1.pdf
- elife_poa_e63199_Figure_2_figure_supplement_2.pdf
- elife_poa_e63199_Figure_3_figure_supplement_1.pdf
- elife_poa_e63199_Figure_3_figure_supplement_2.pdf
- elife_poa_e63199_Figure_3_figure_supplement_3.pdf
- elife_poa_e63199_Figure_4_figure_supplement_1.pdf
- elife_poa_e63199_Figure_5_figure_supplement_1.pdf
- elife_poa_e63199_Figure_5_figure_supplement_2.pdf
