# Supplementary figures and images for: Mixed cytomegalovirus genotypes in HIV-positive mothers show compartmentalization and distinct patterns of transmission to infants
Source: eLife journal article supplement (doi:10.7554/elife.63199), 2020-12-31

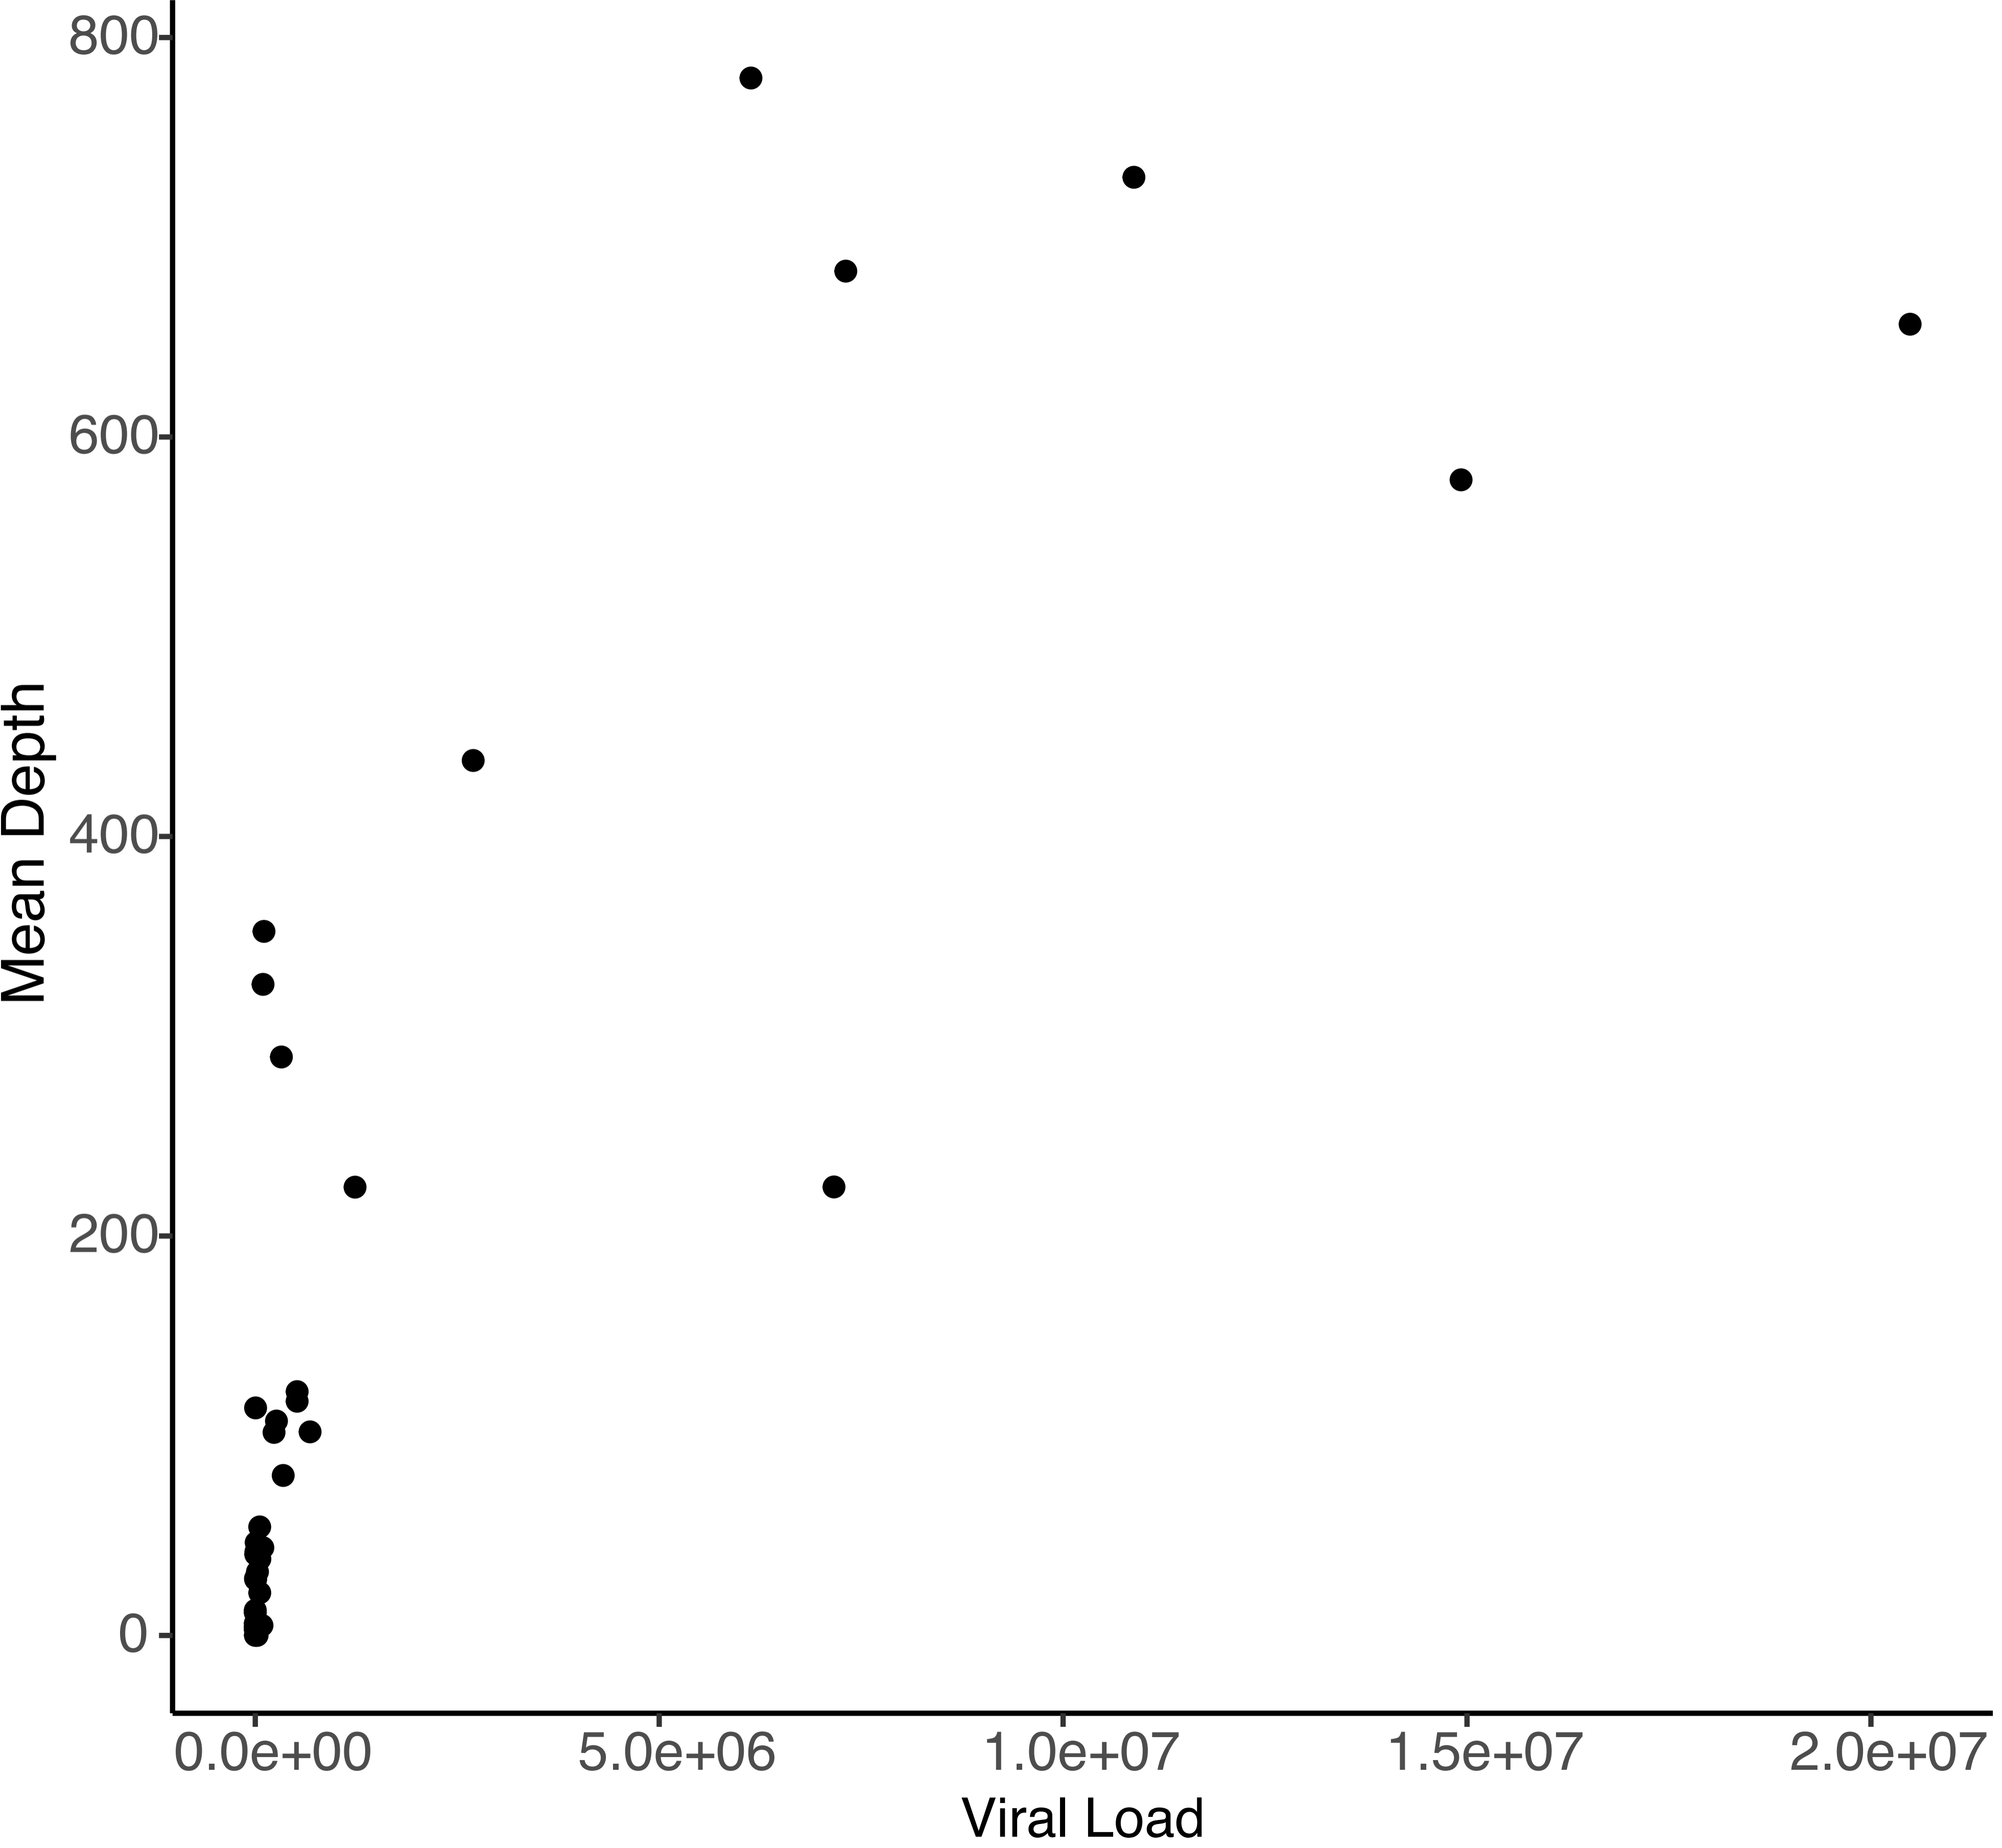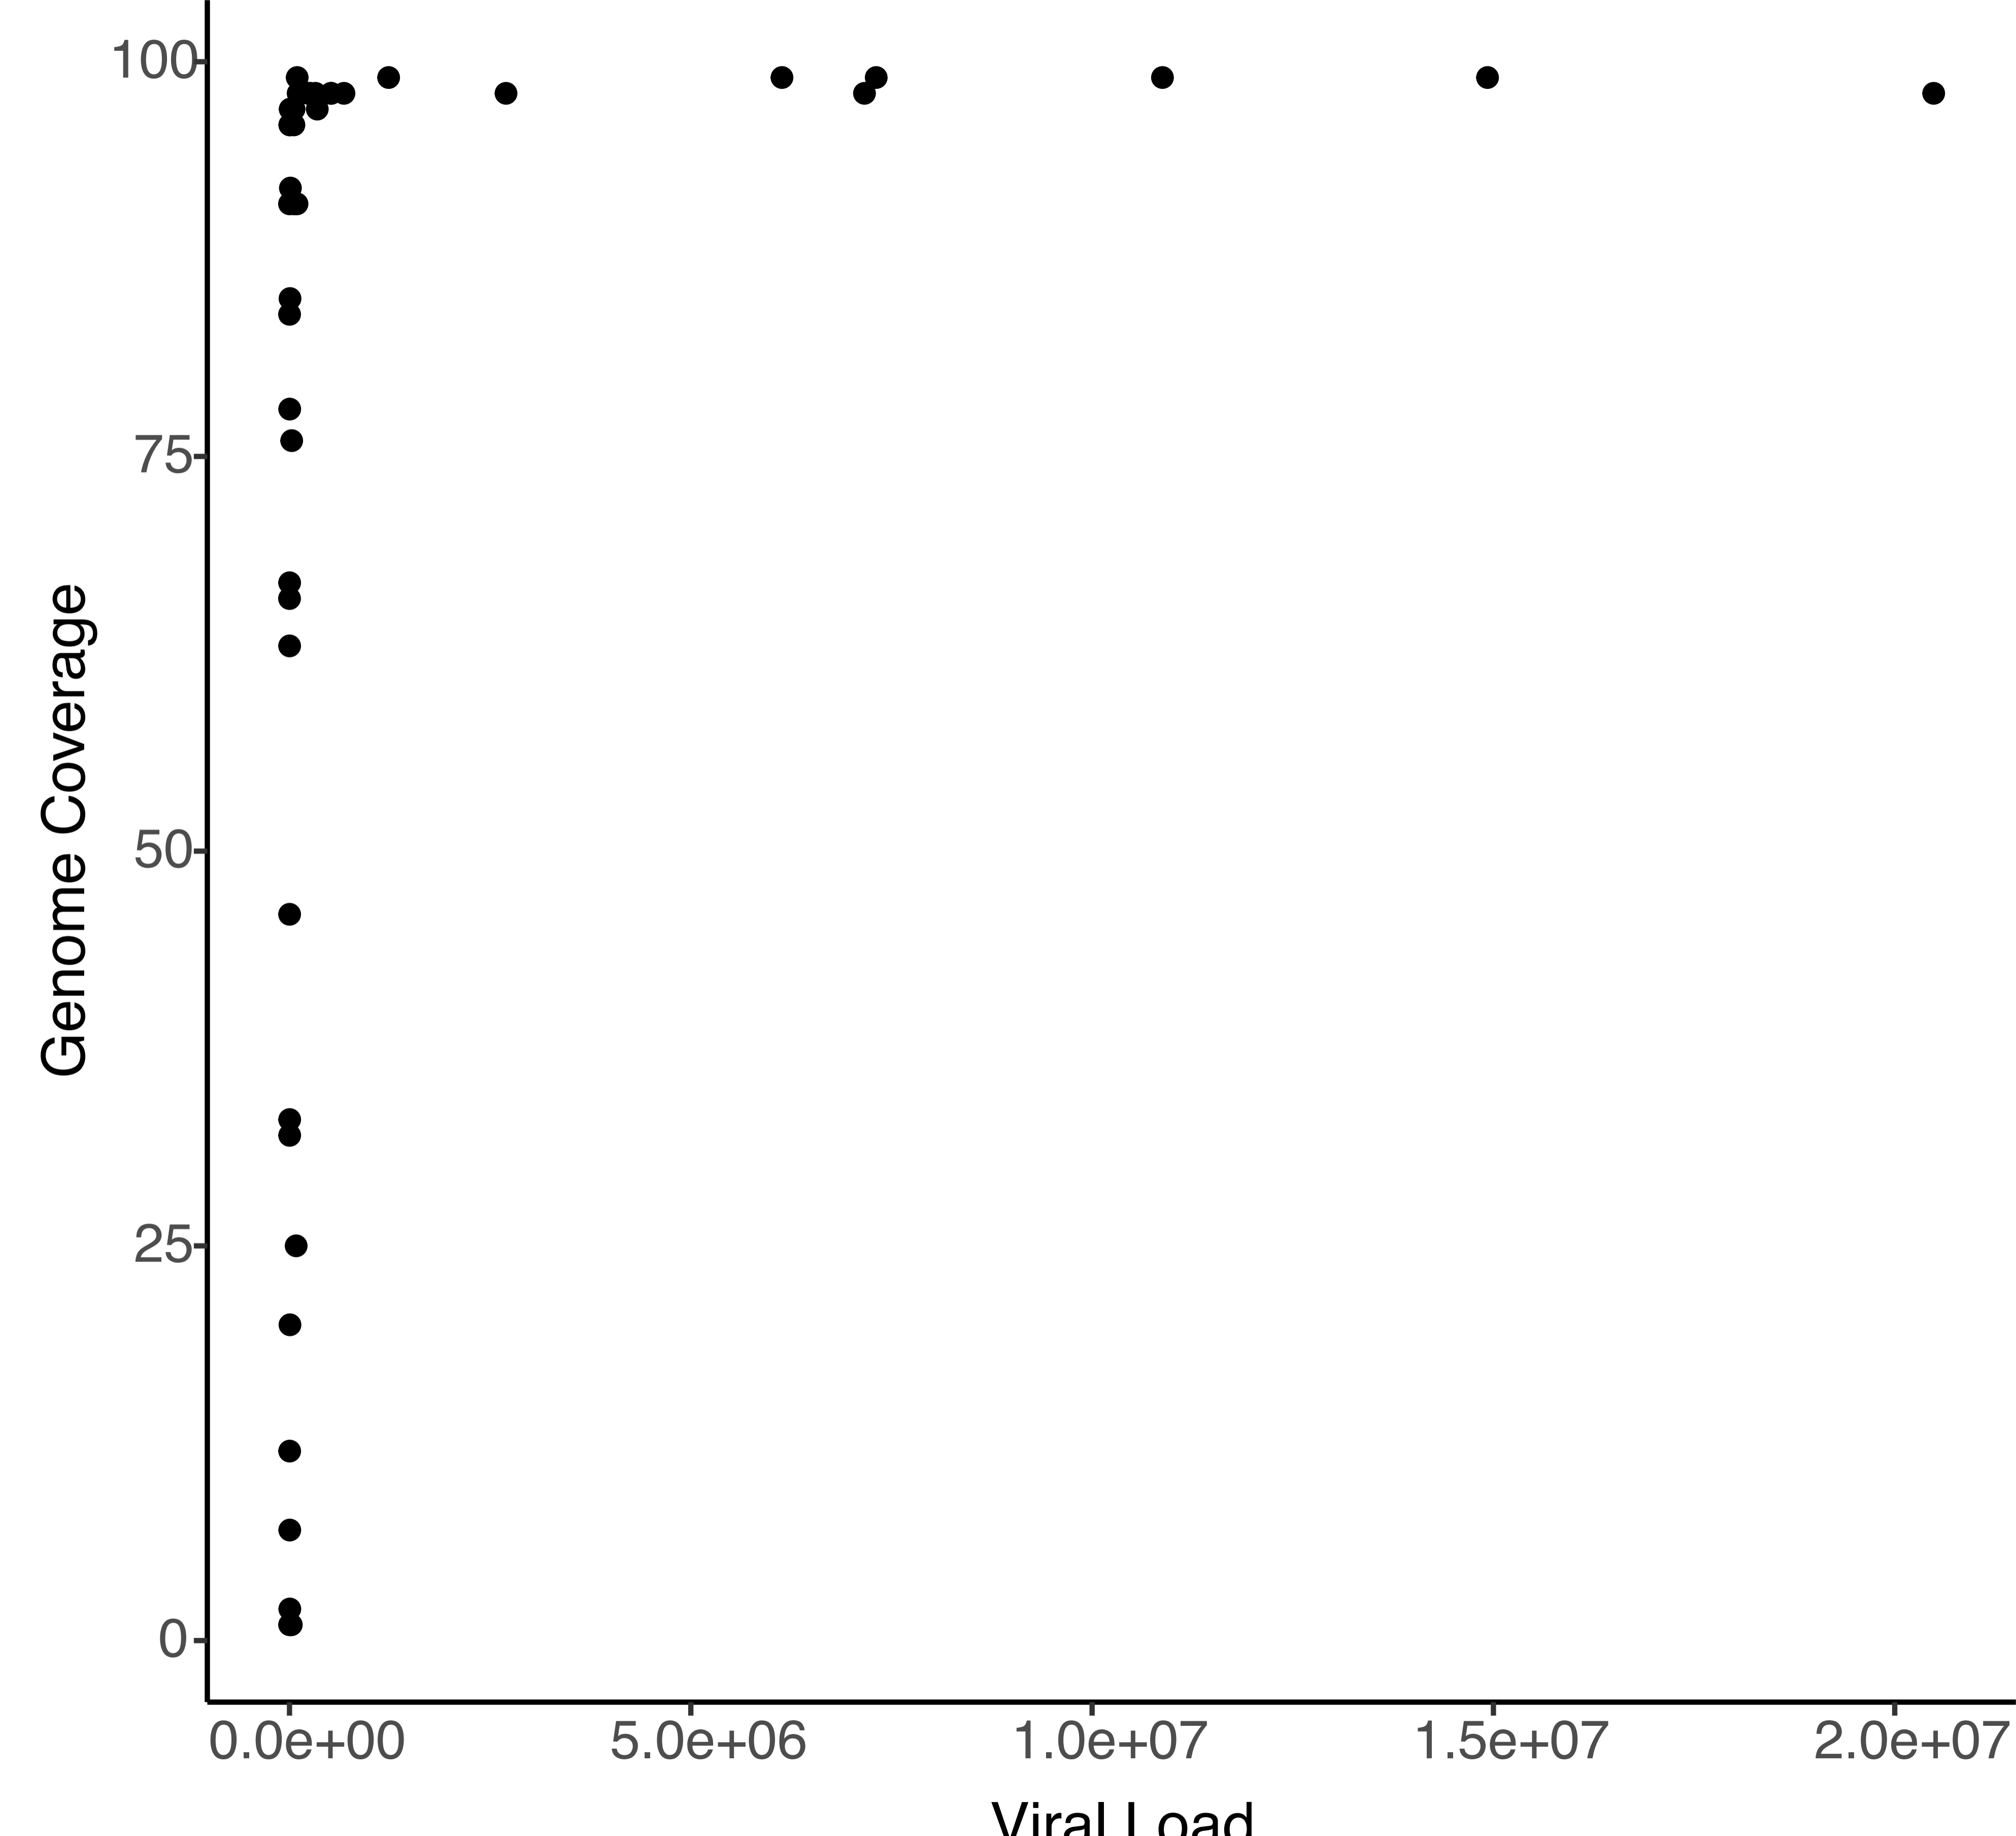

Supplement: supp [file elife-63199-supp-v1.zip › elife_poa_e63199_Figure_1_figure_supplement_1.pdf]

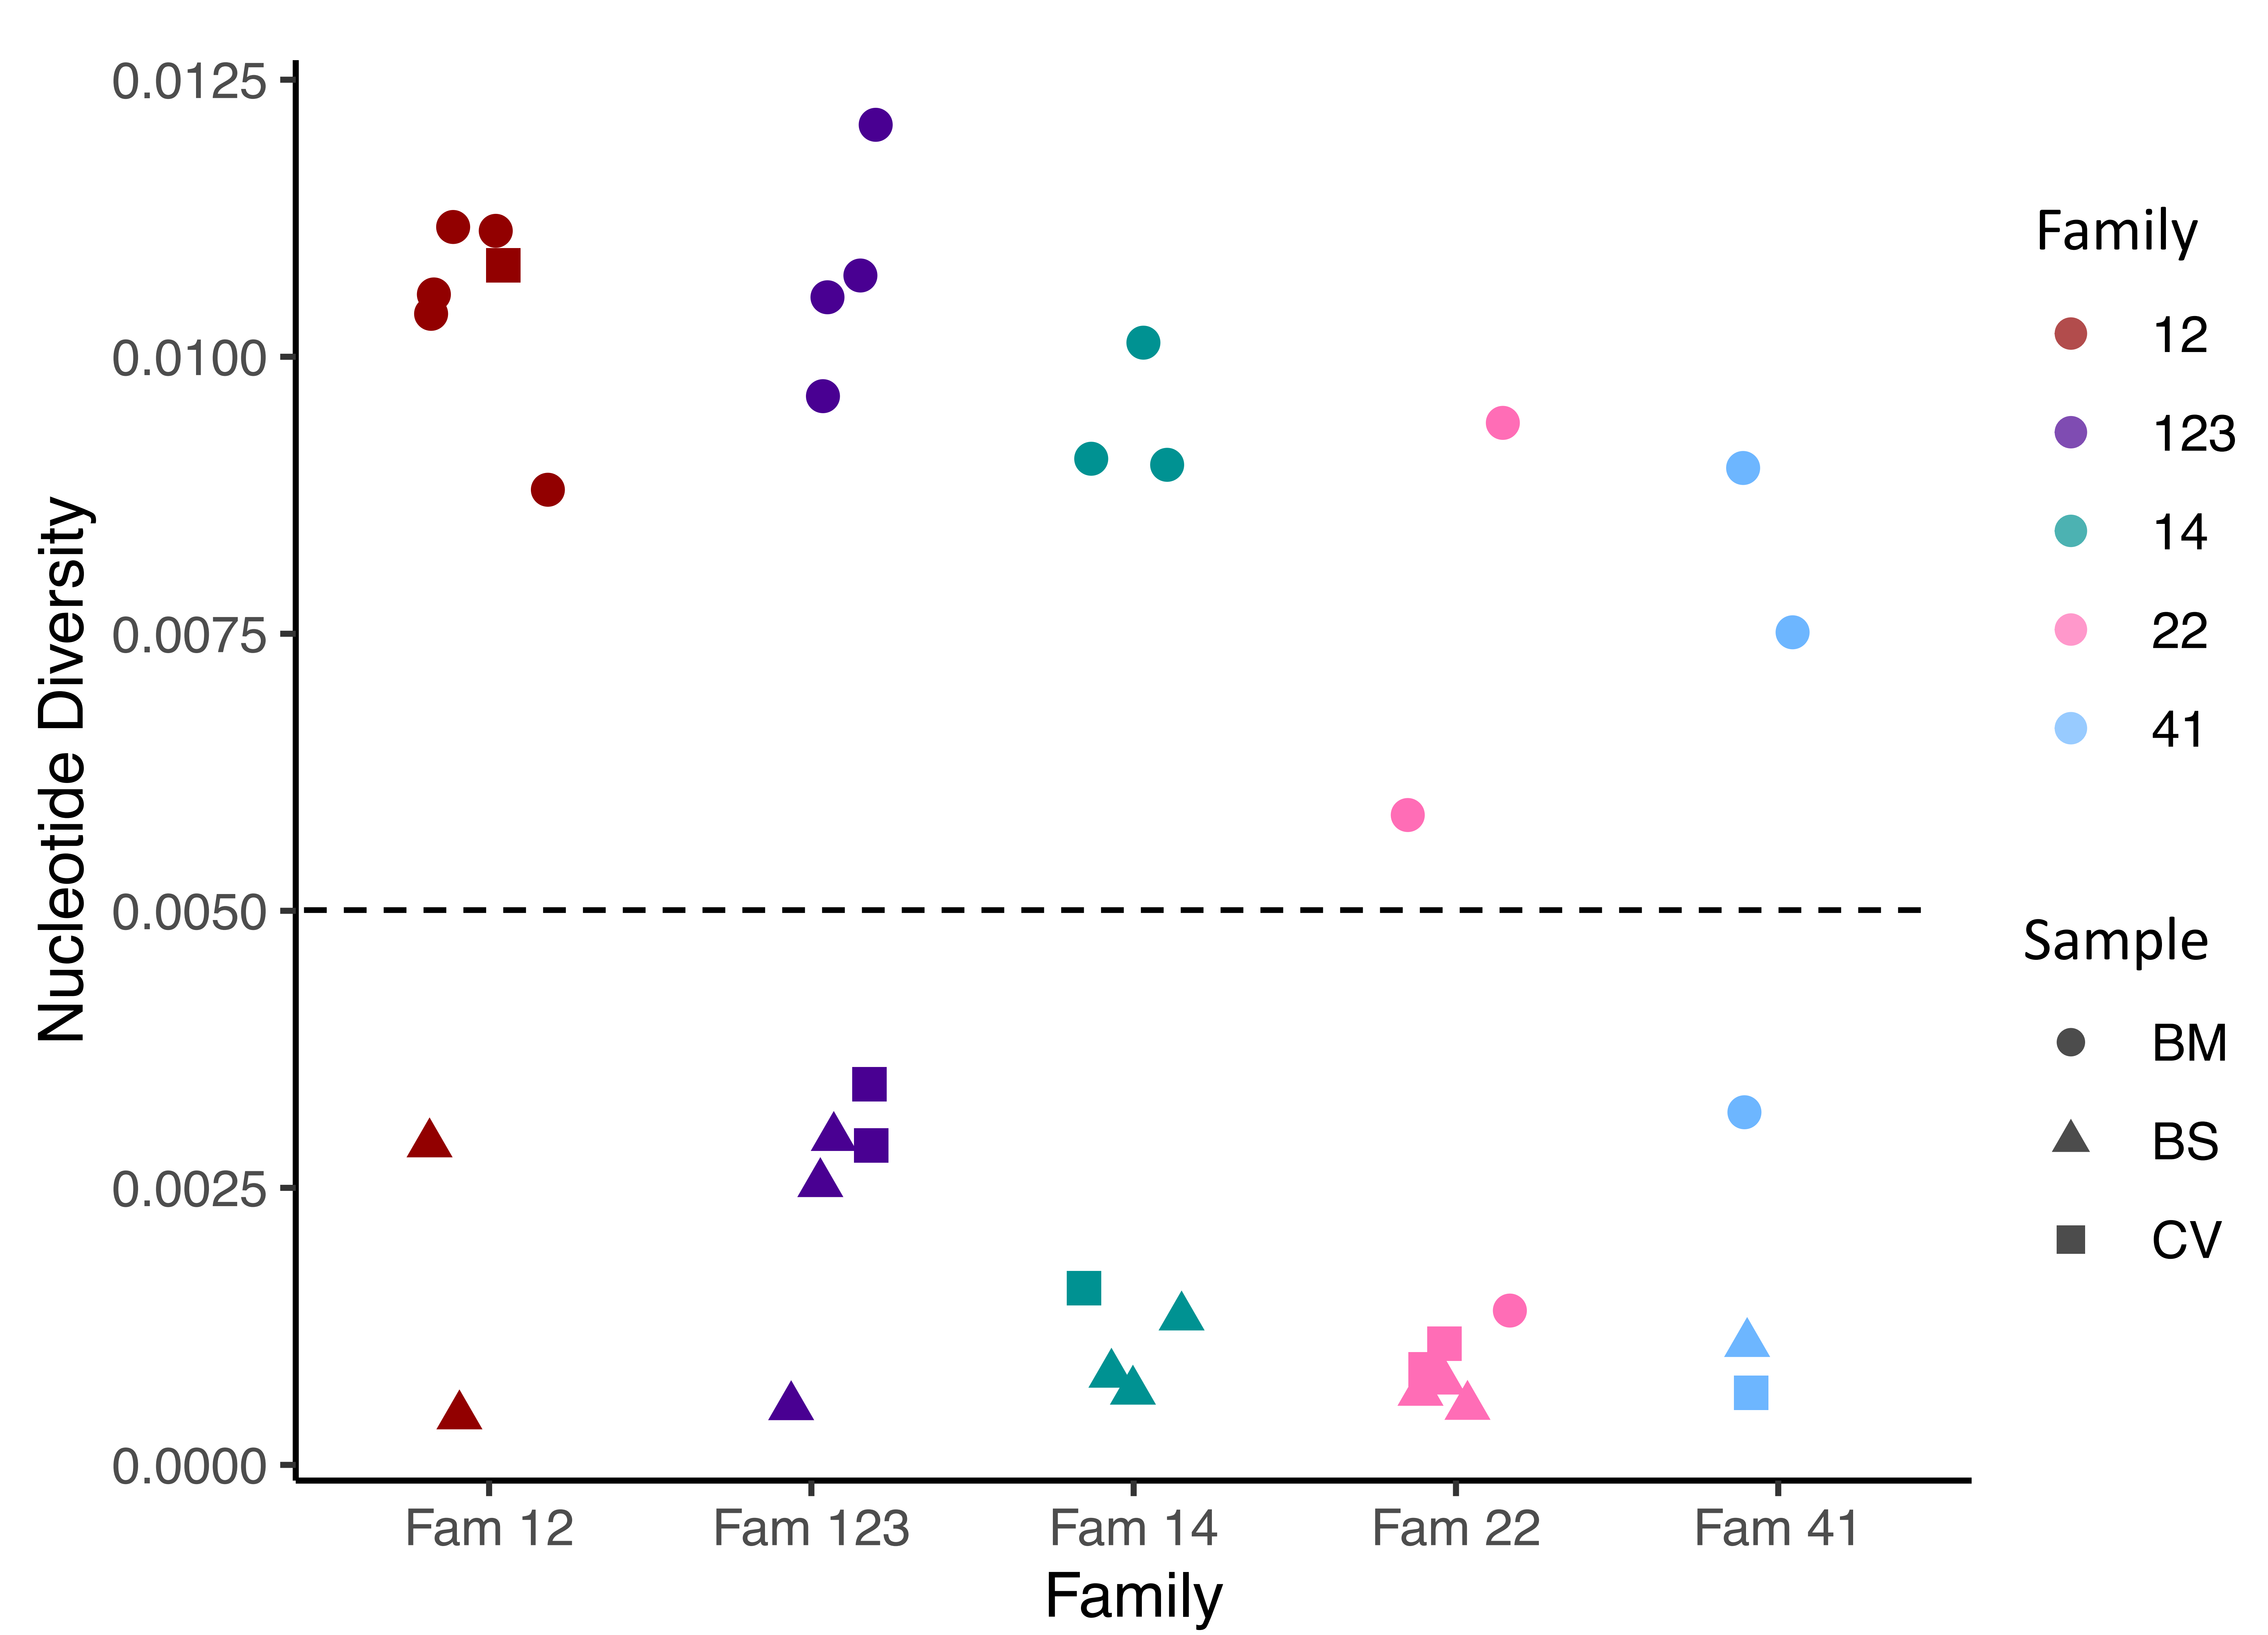

Supplement: supp [file elife-63199-supp-v1.zip › elife_poa_e63199_Figure_2_figure_supplement_1.pdf]

Estimated Diversity

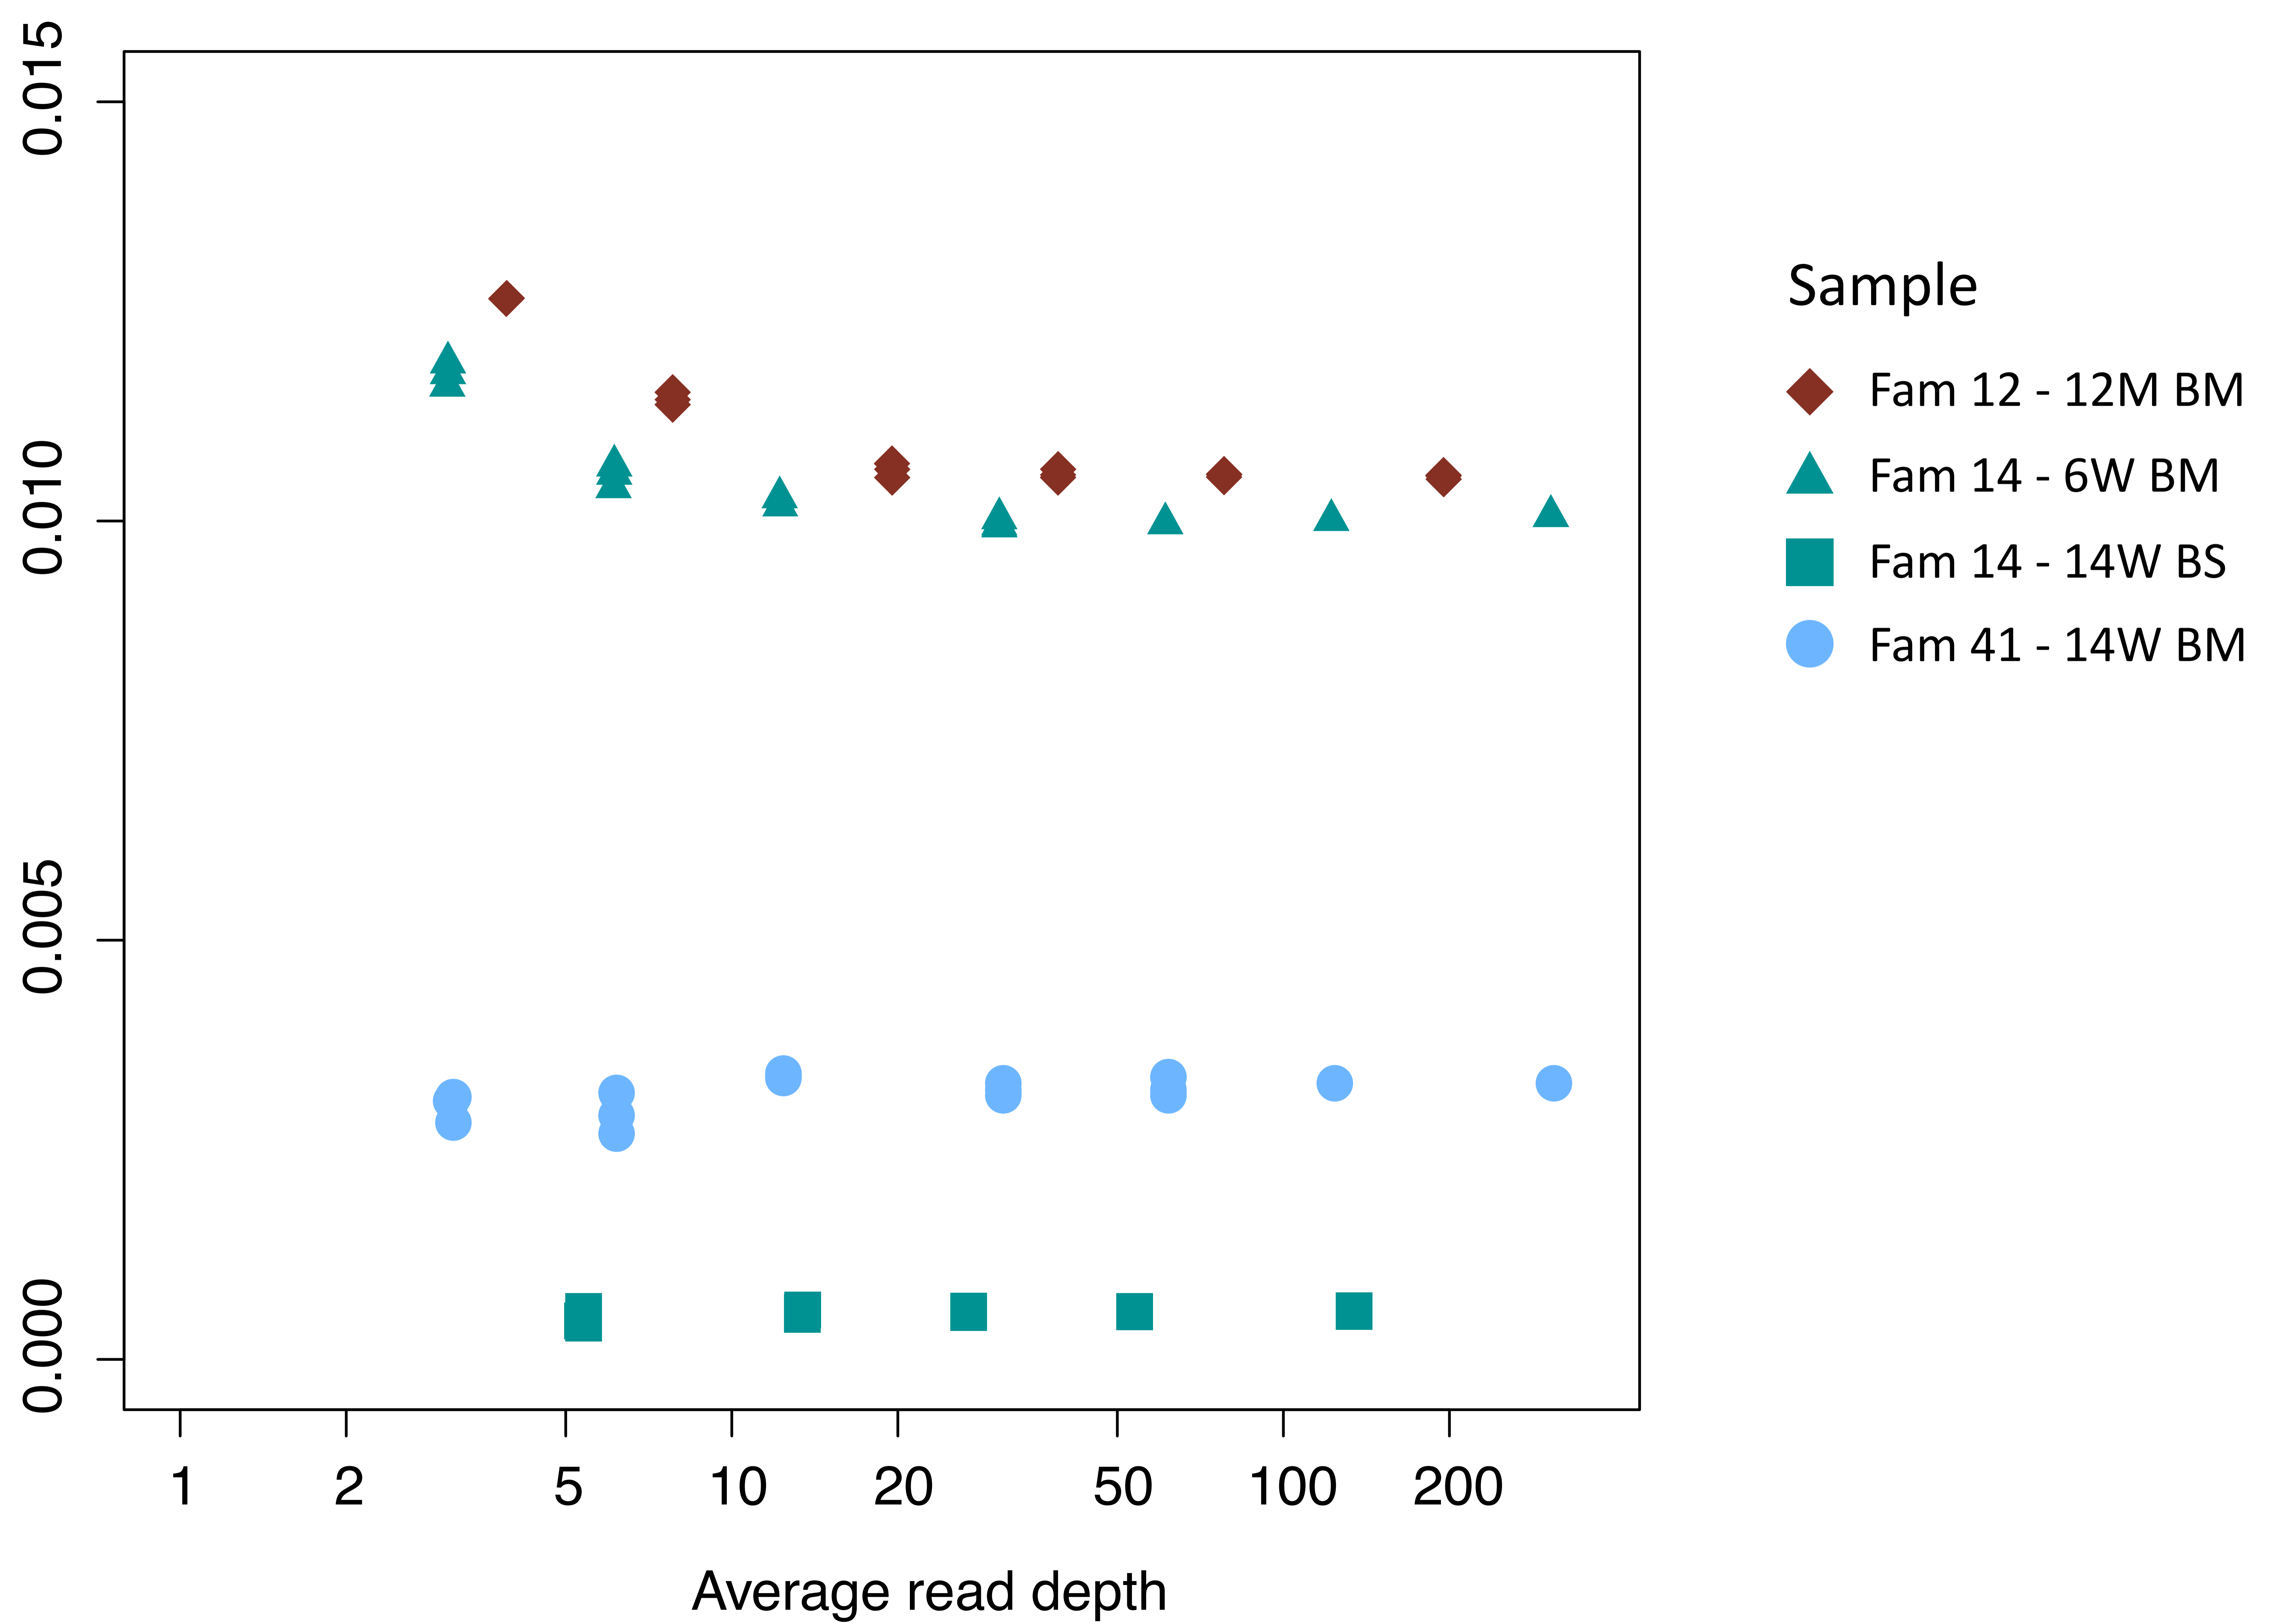

Supplement: supp [file elife-63199-supp-v1.zip › elife_poa_e63199_Figure_2_figure_supplement_2.pdf]

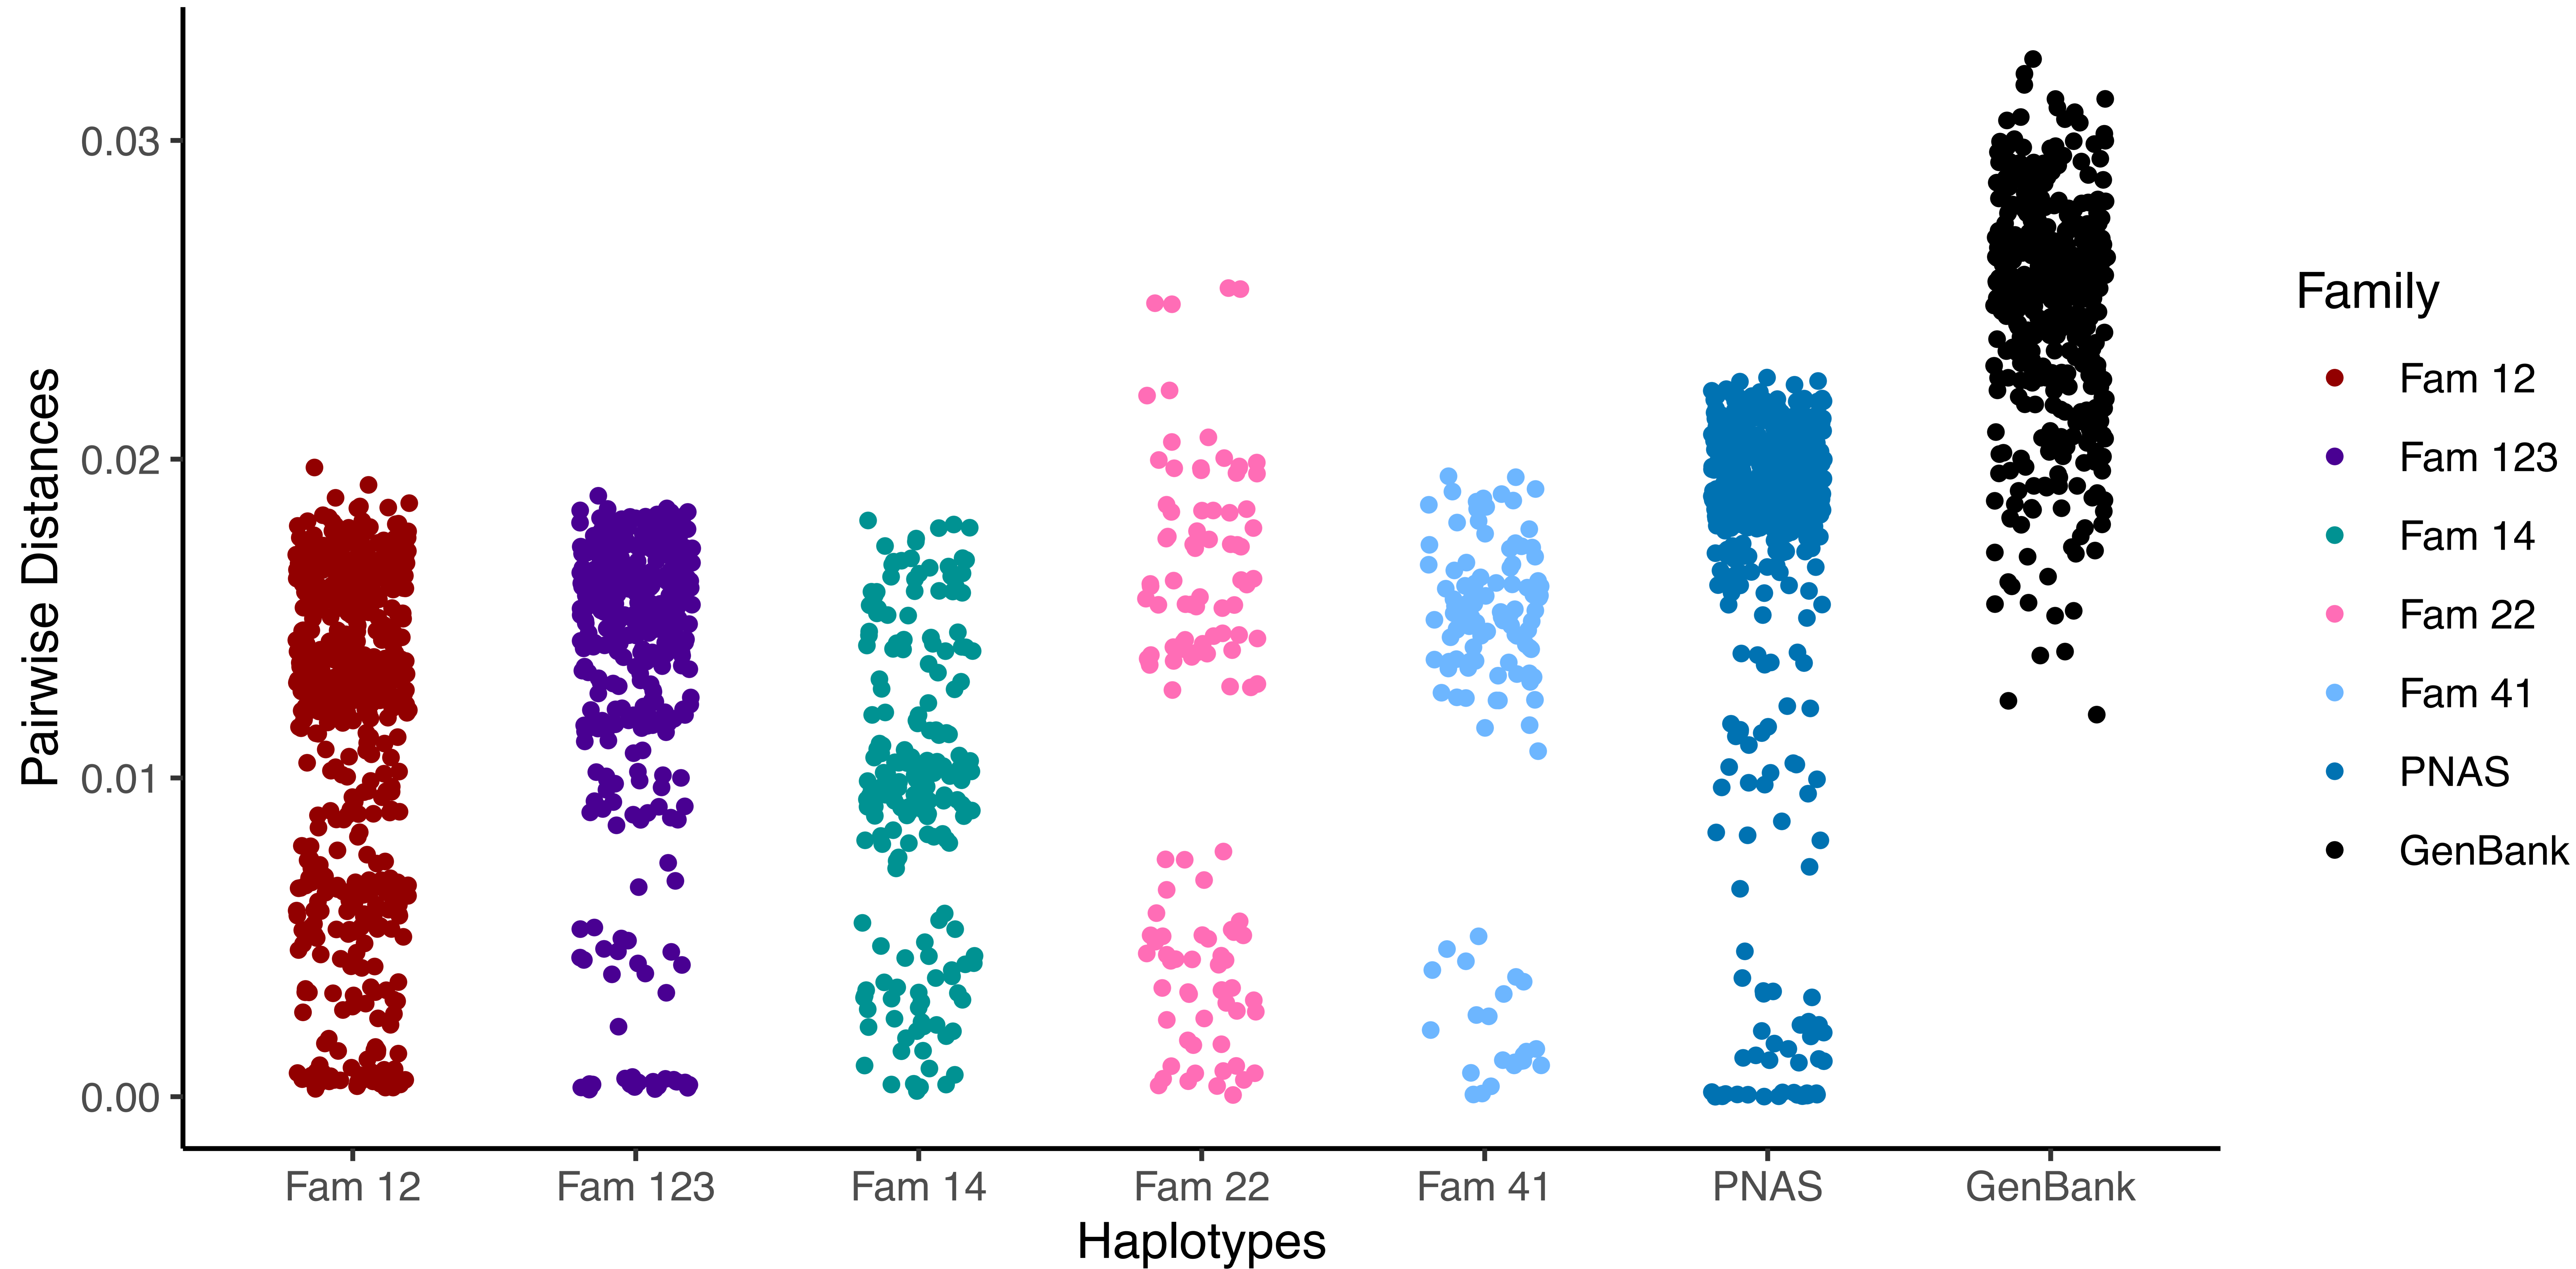

Supplement: supp [file elife-63199-supp-v1.zip › elife_poa_e63199_Figure_3_figure_supplement_1.pdf]

## Family 12

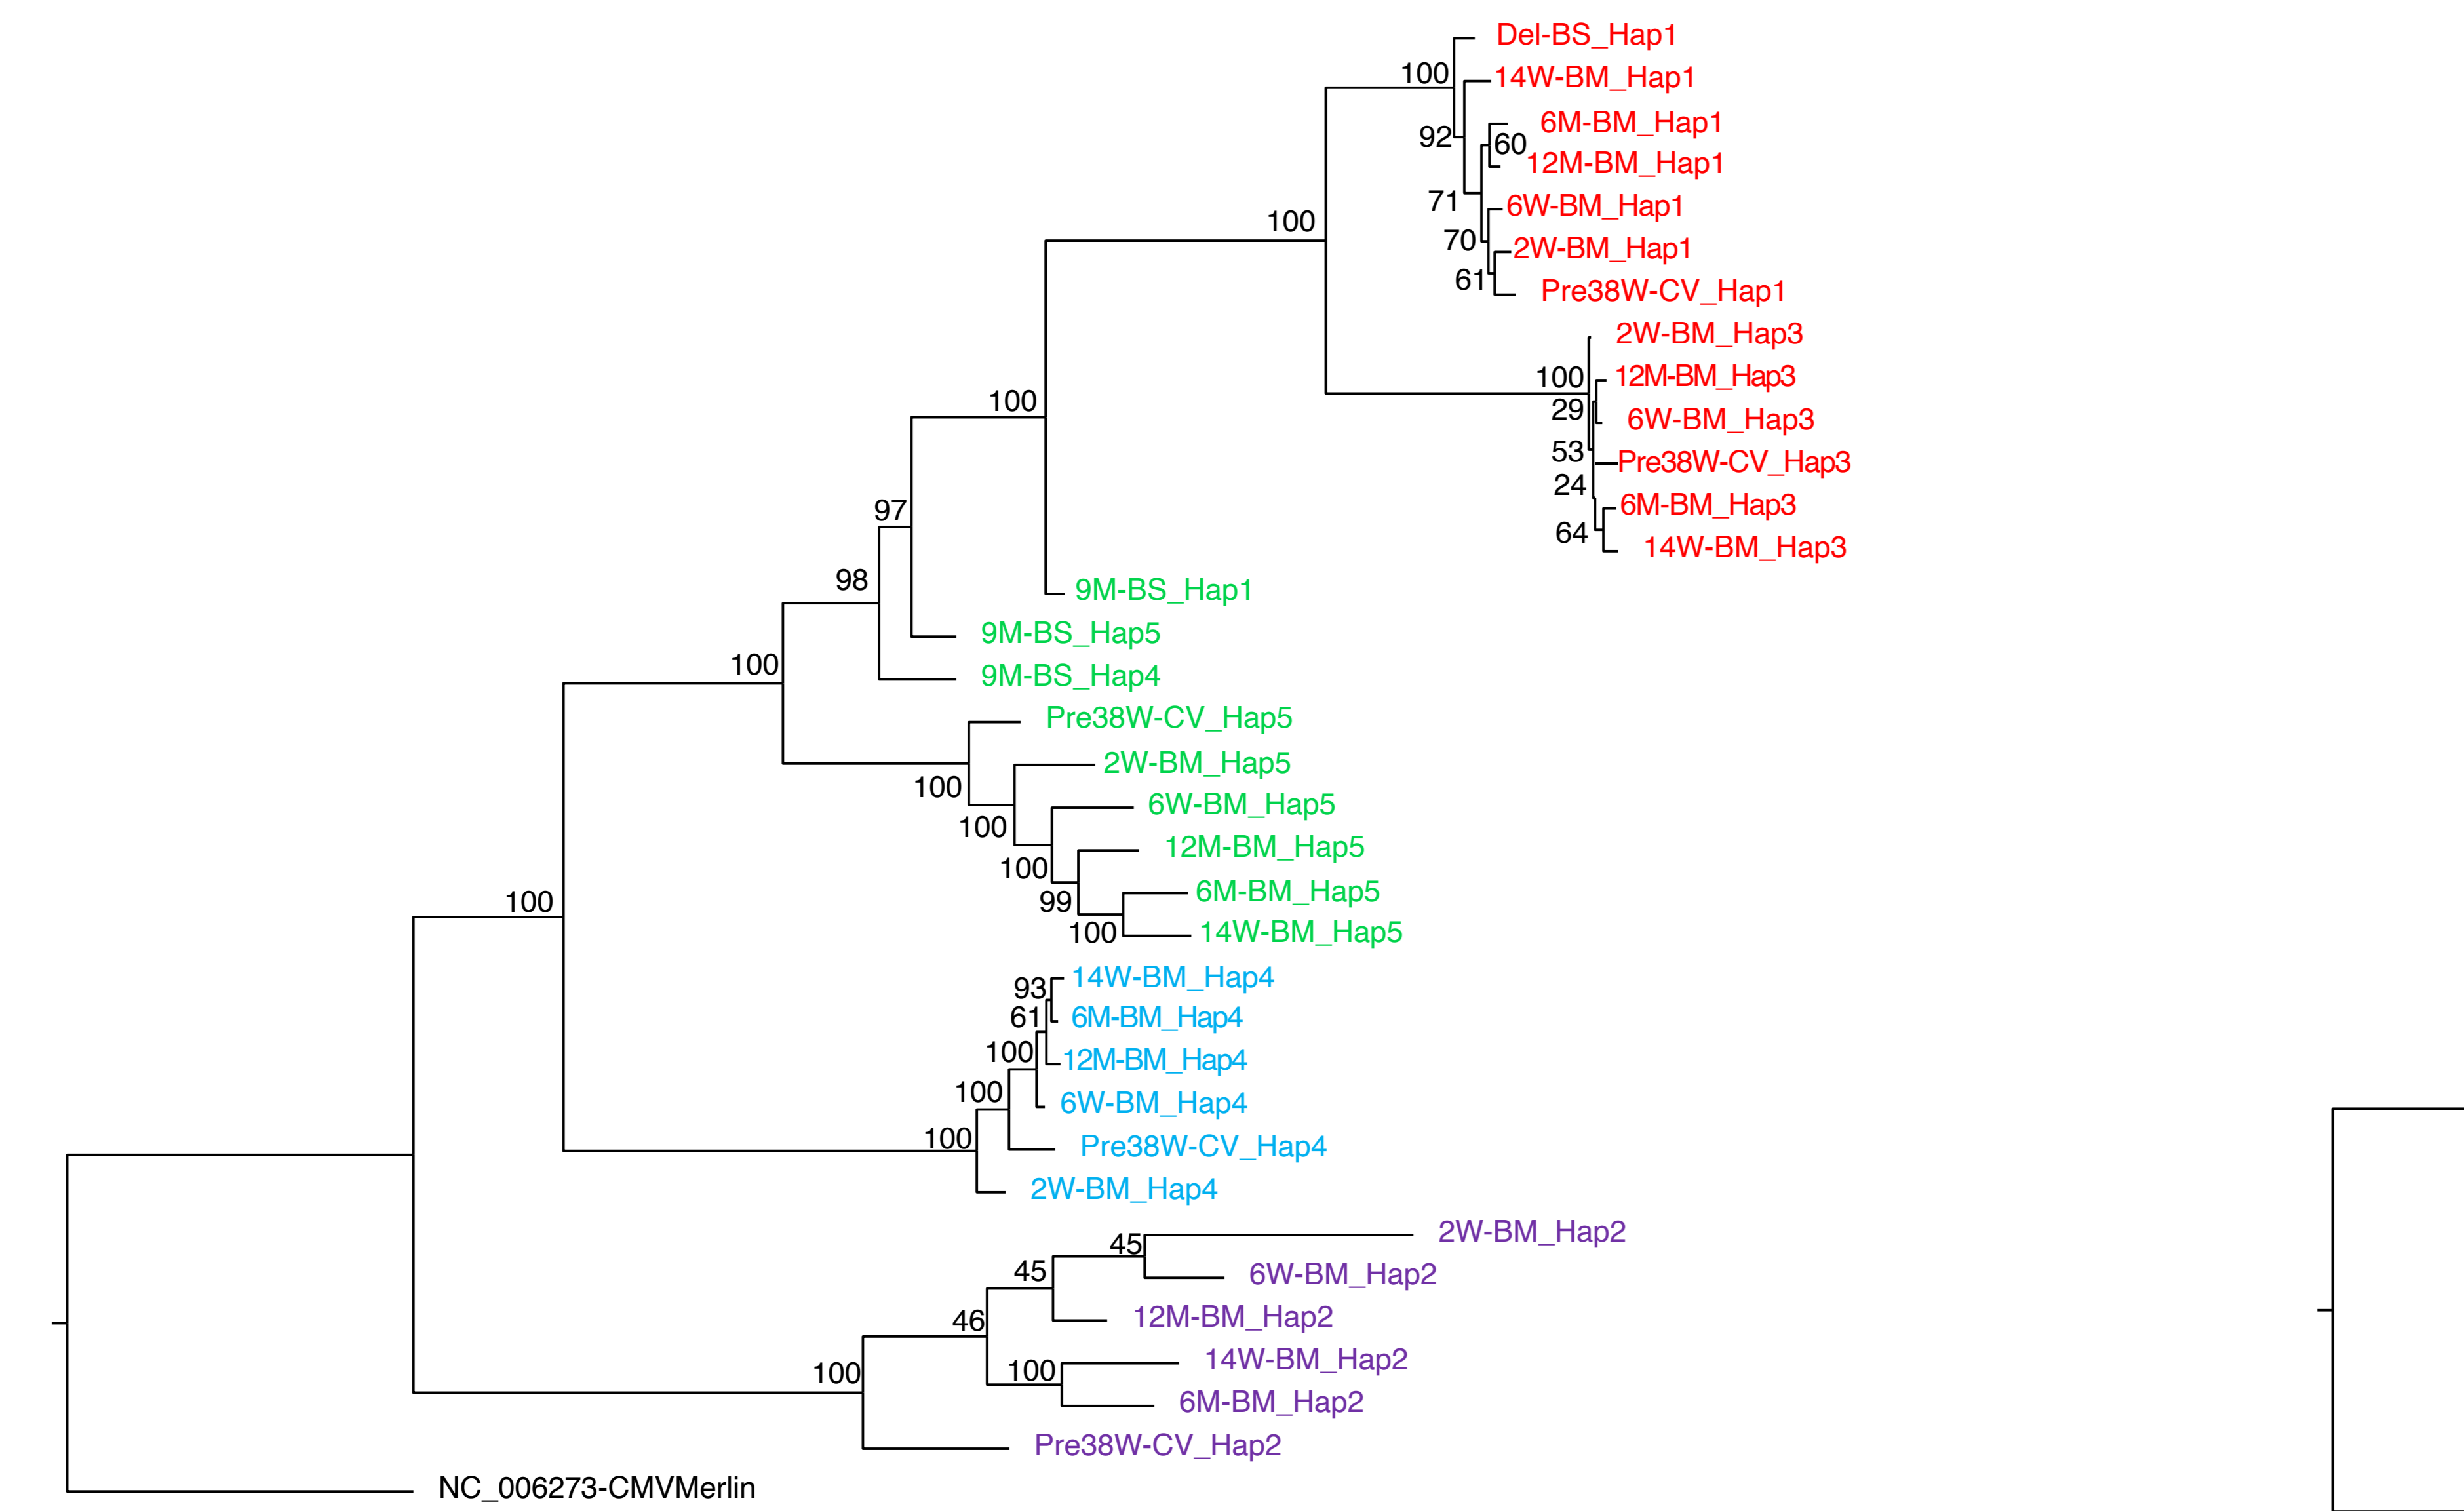

## Family 22

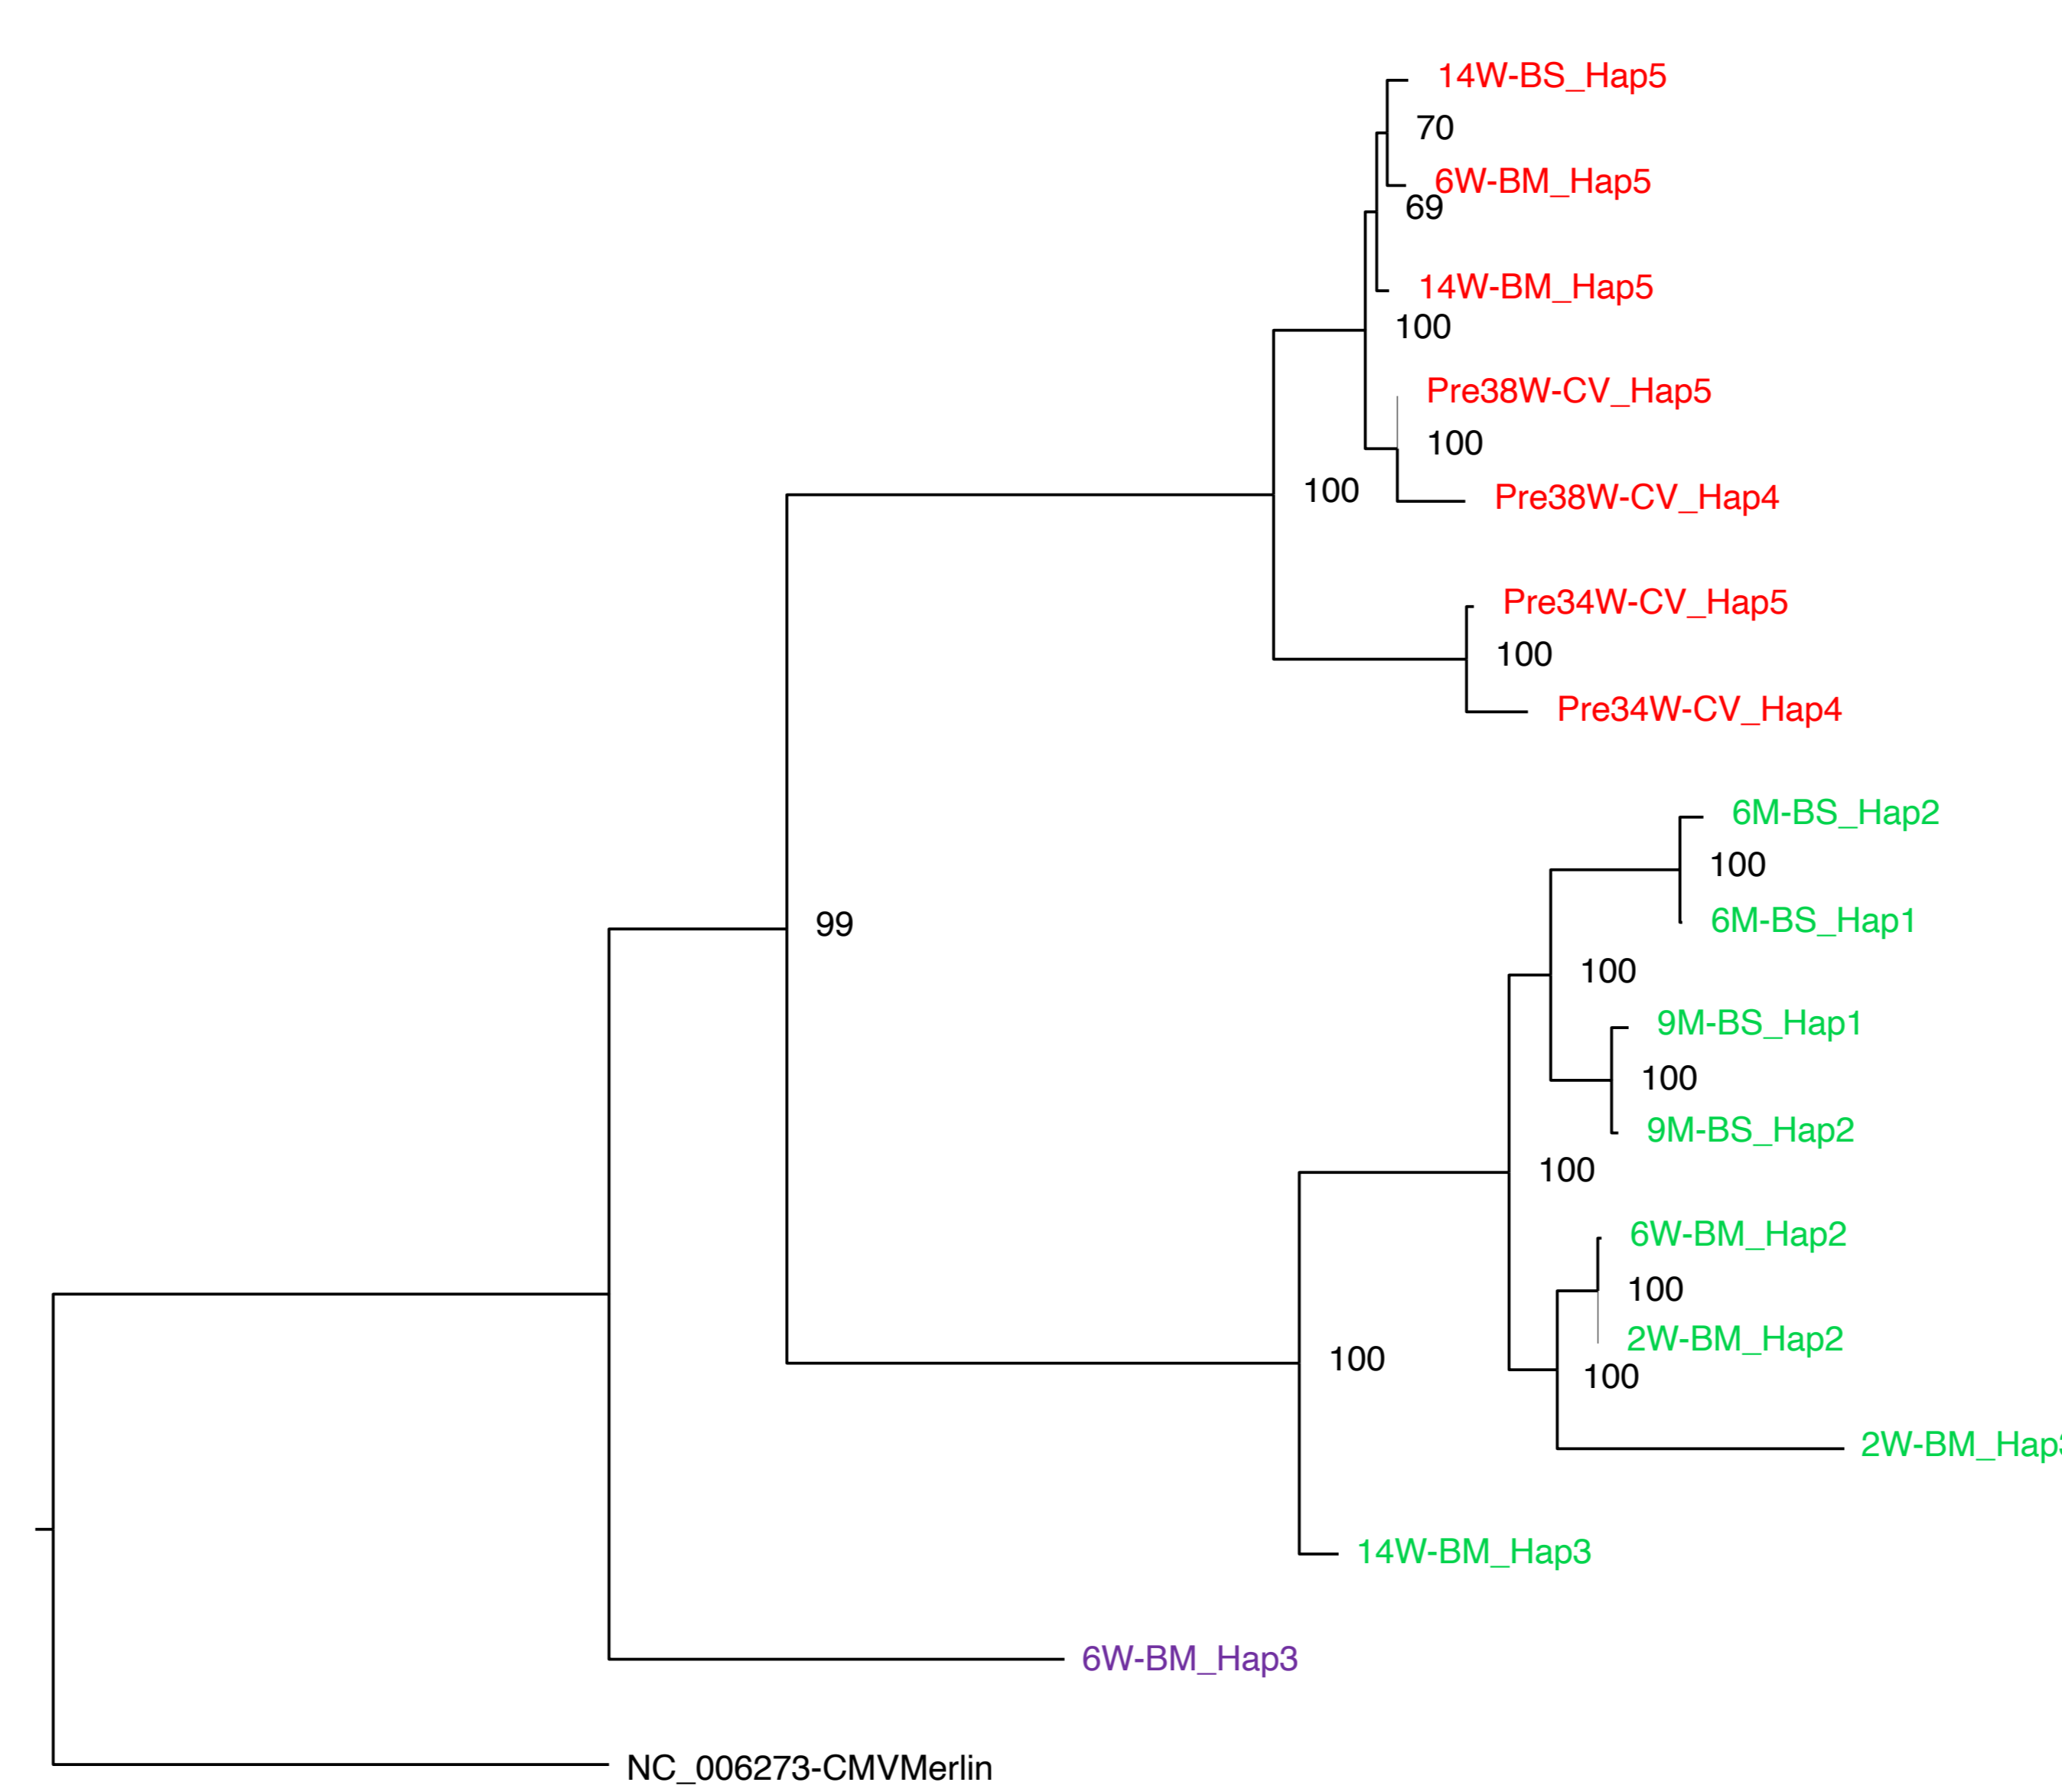

## Family 123

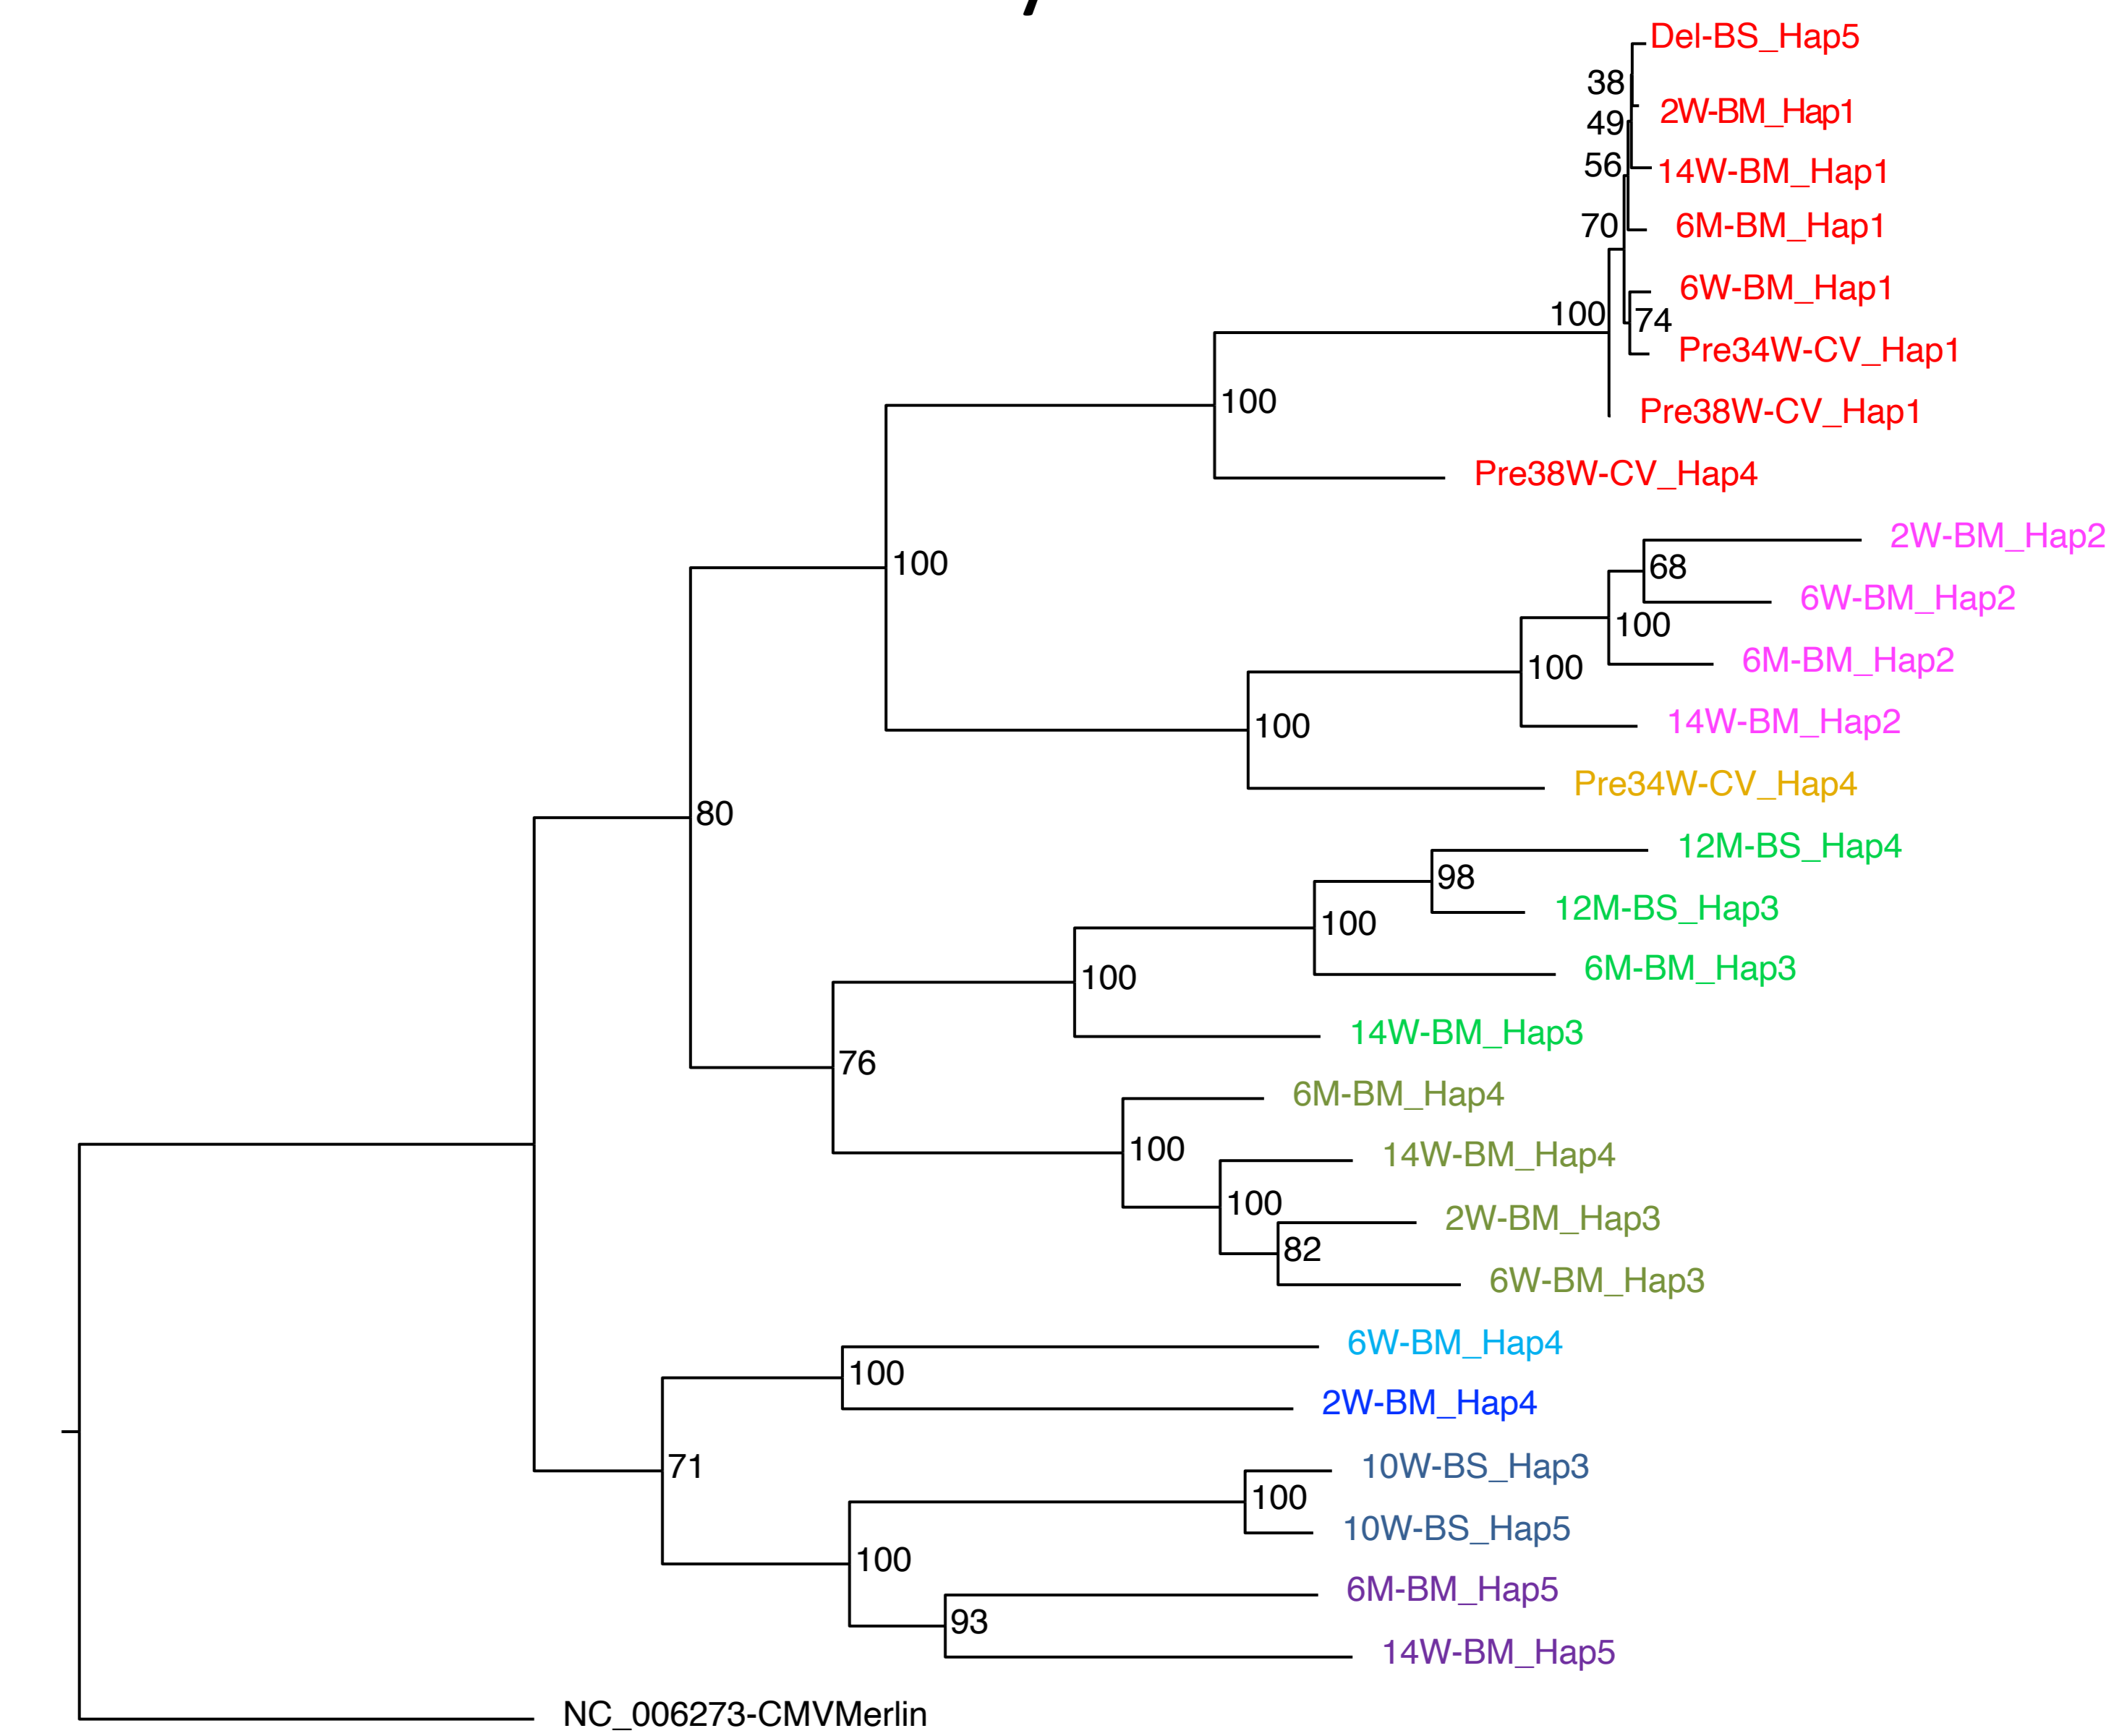

## Family 14

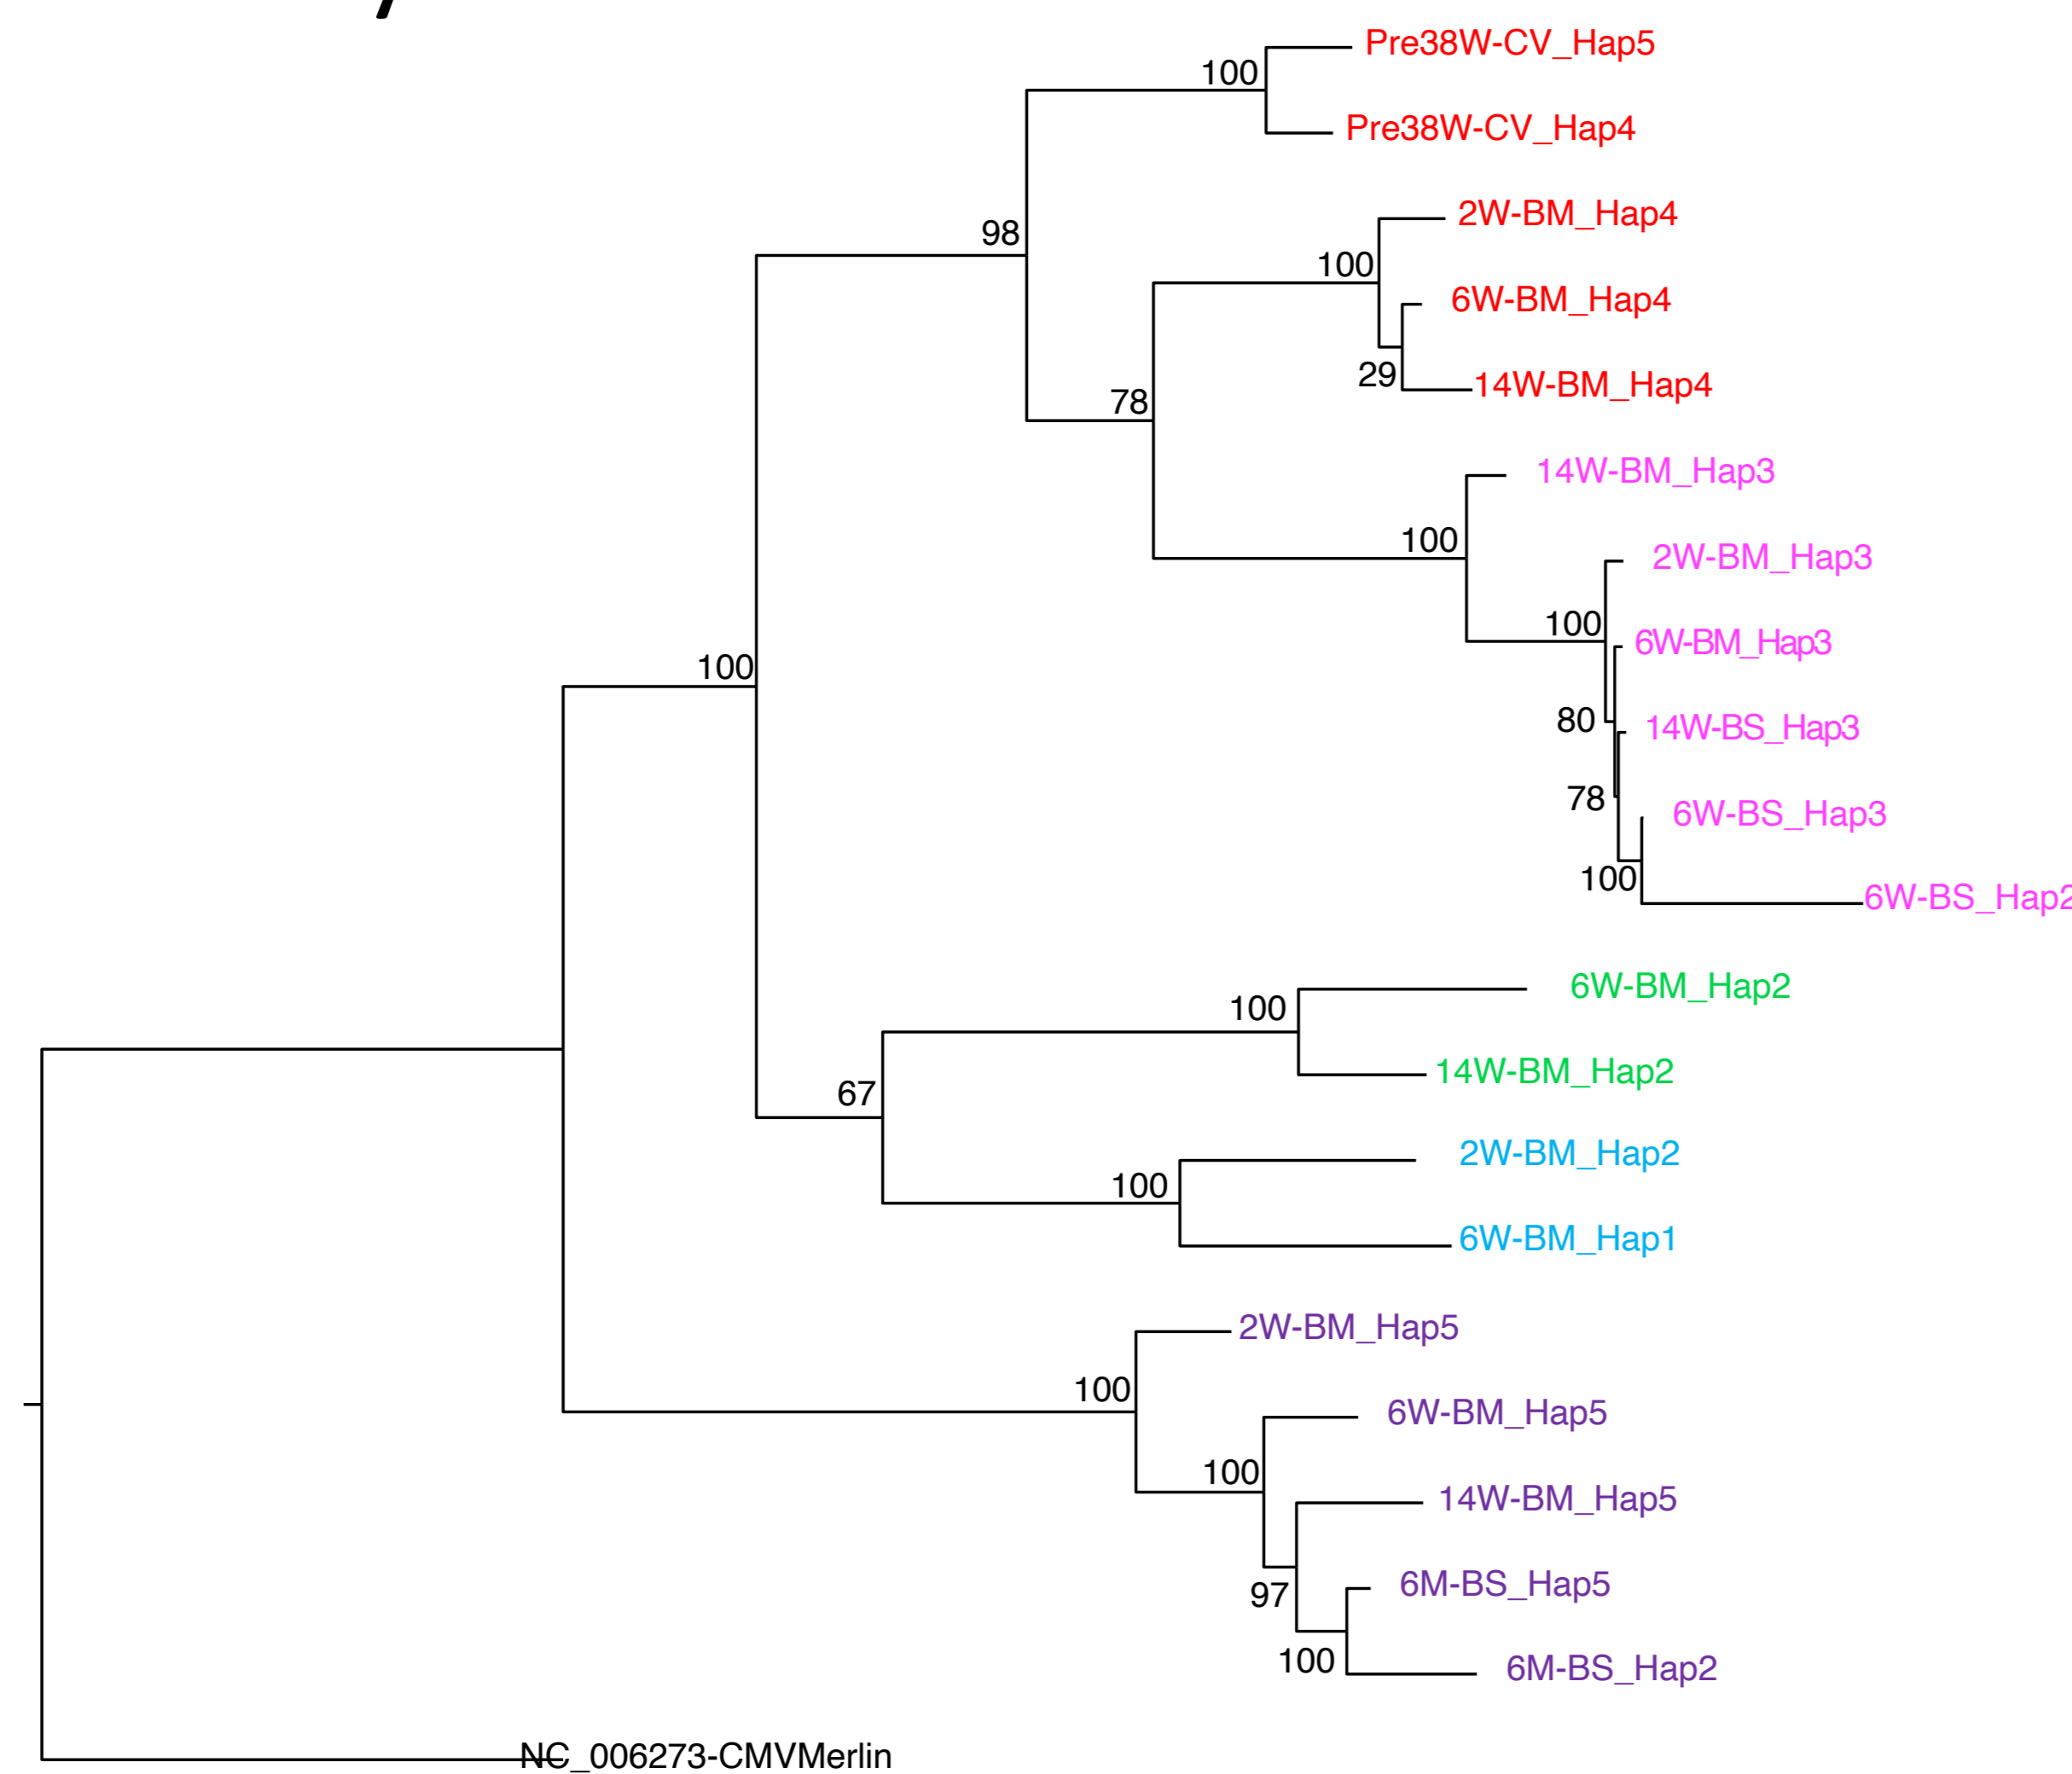

## Family 41

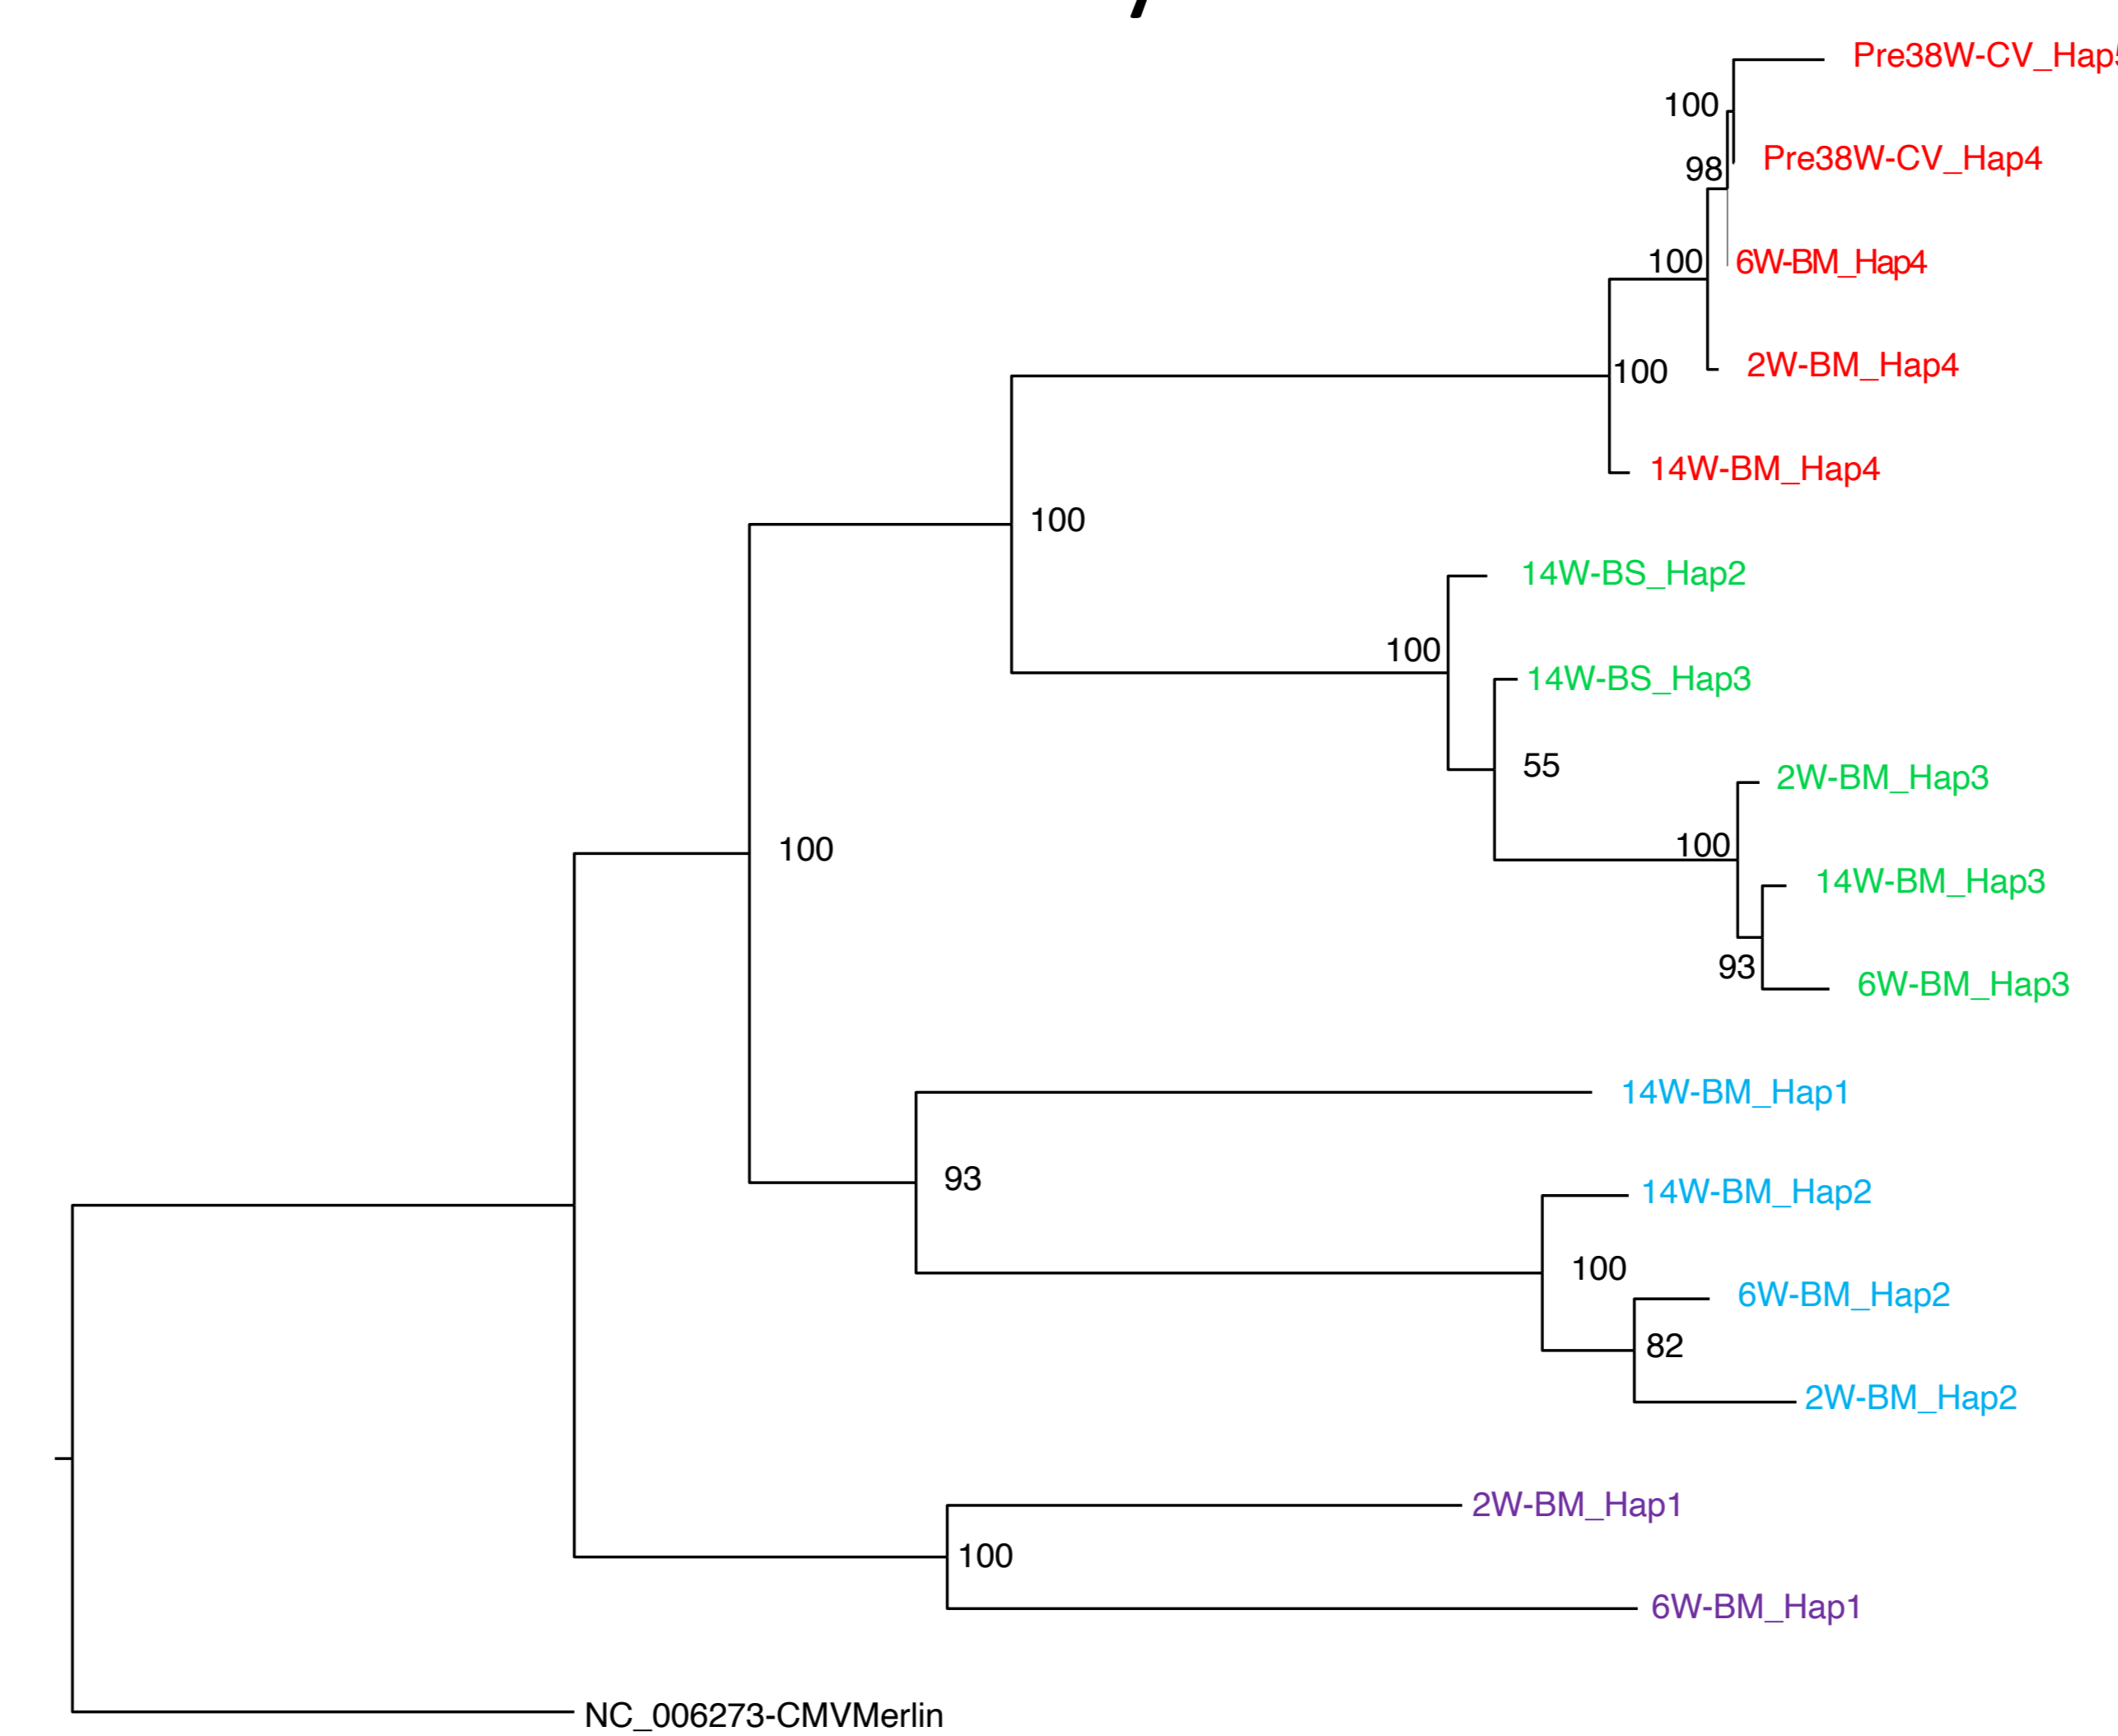

Supplement: supp [file elife-63199-supp-v1.zip › elife_poa_e63199_Figure_3_figure_supplement_2.pdf]

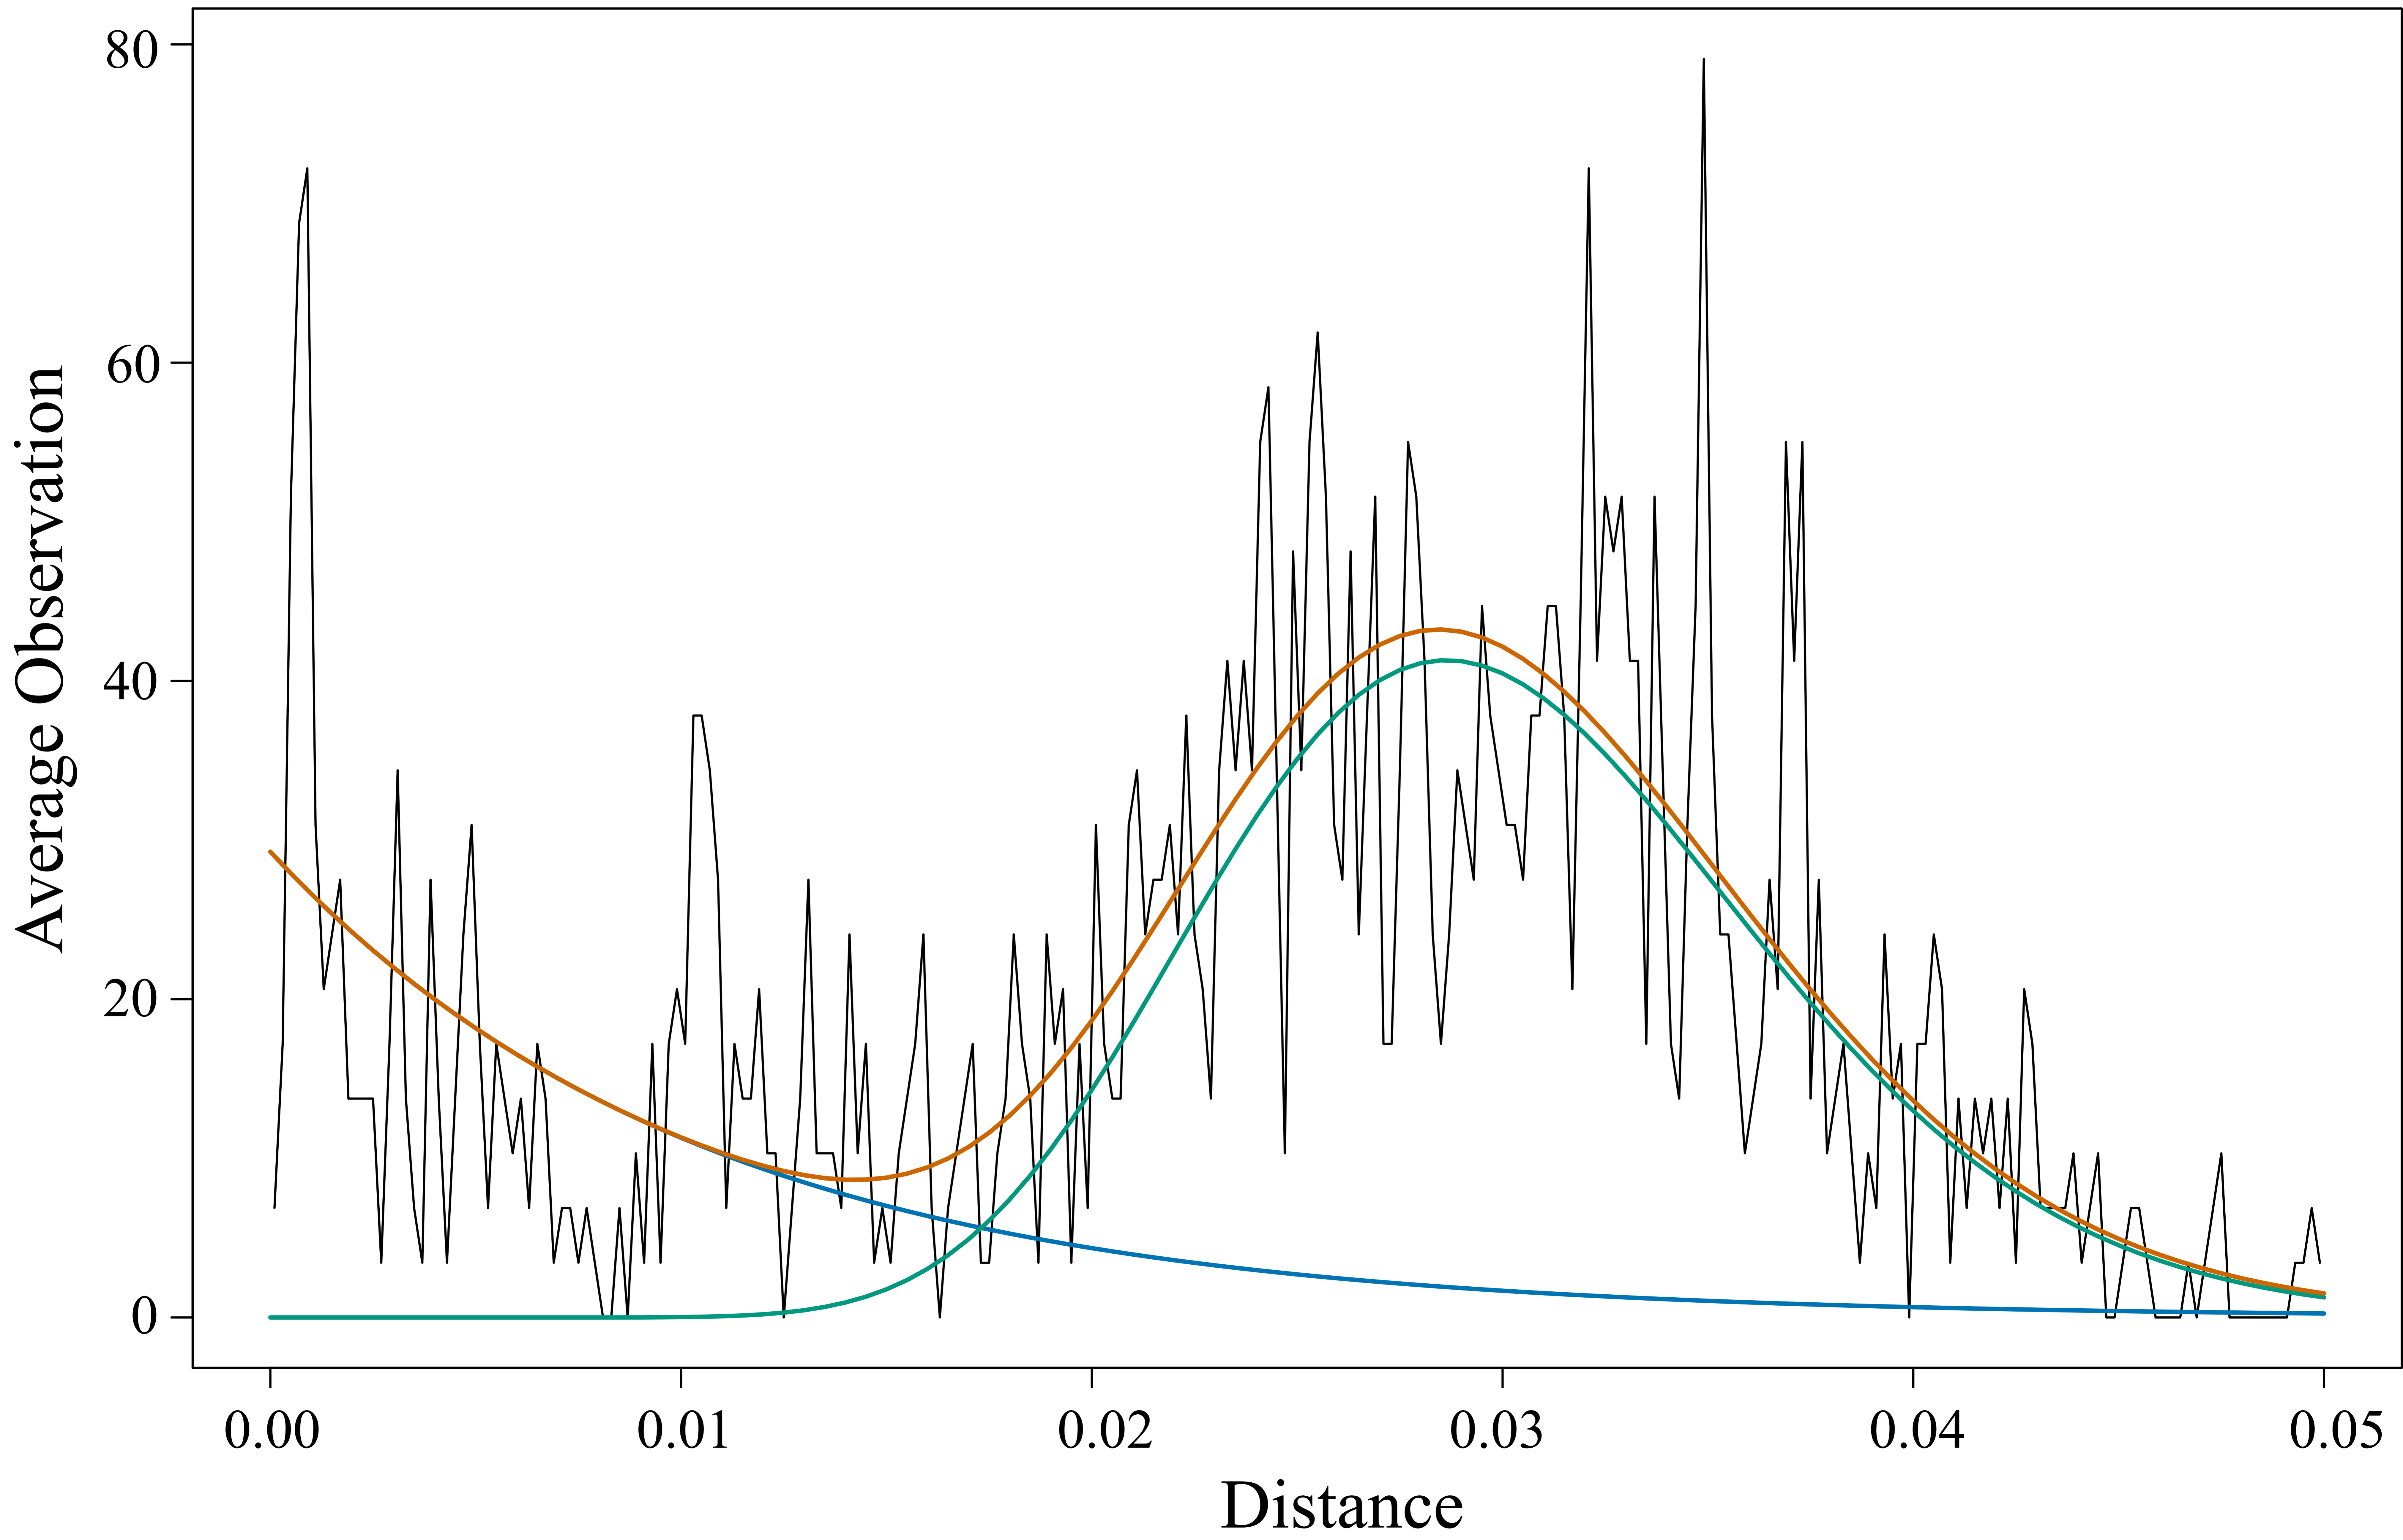

Supplement: supp [file elife-63199-supp-v1.zip › elife_poa_e63199_Figure_3_figure_supplement_3.pdf]

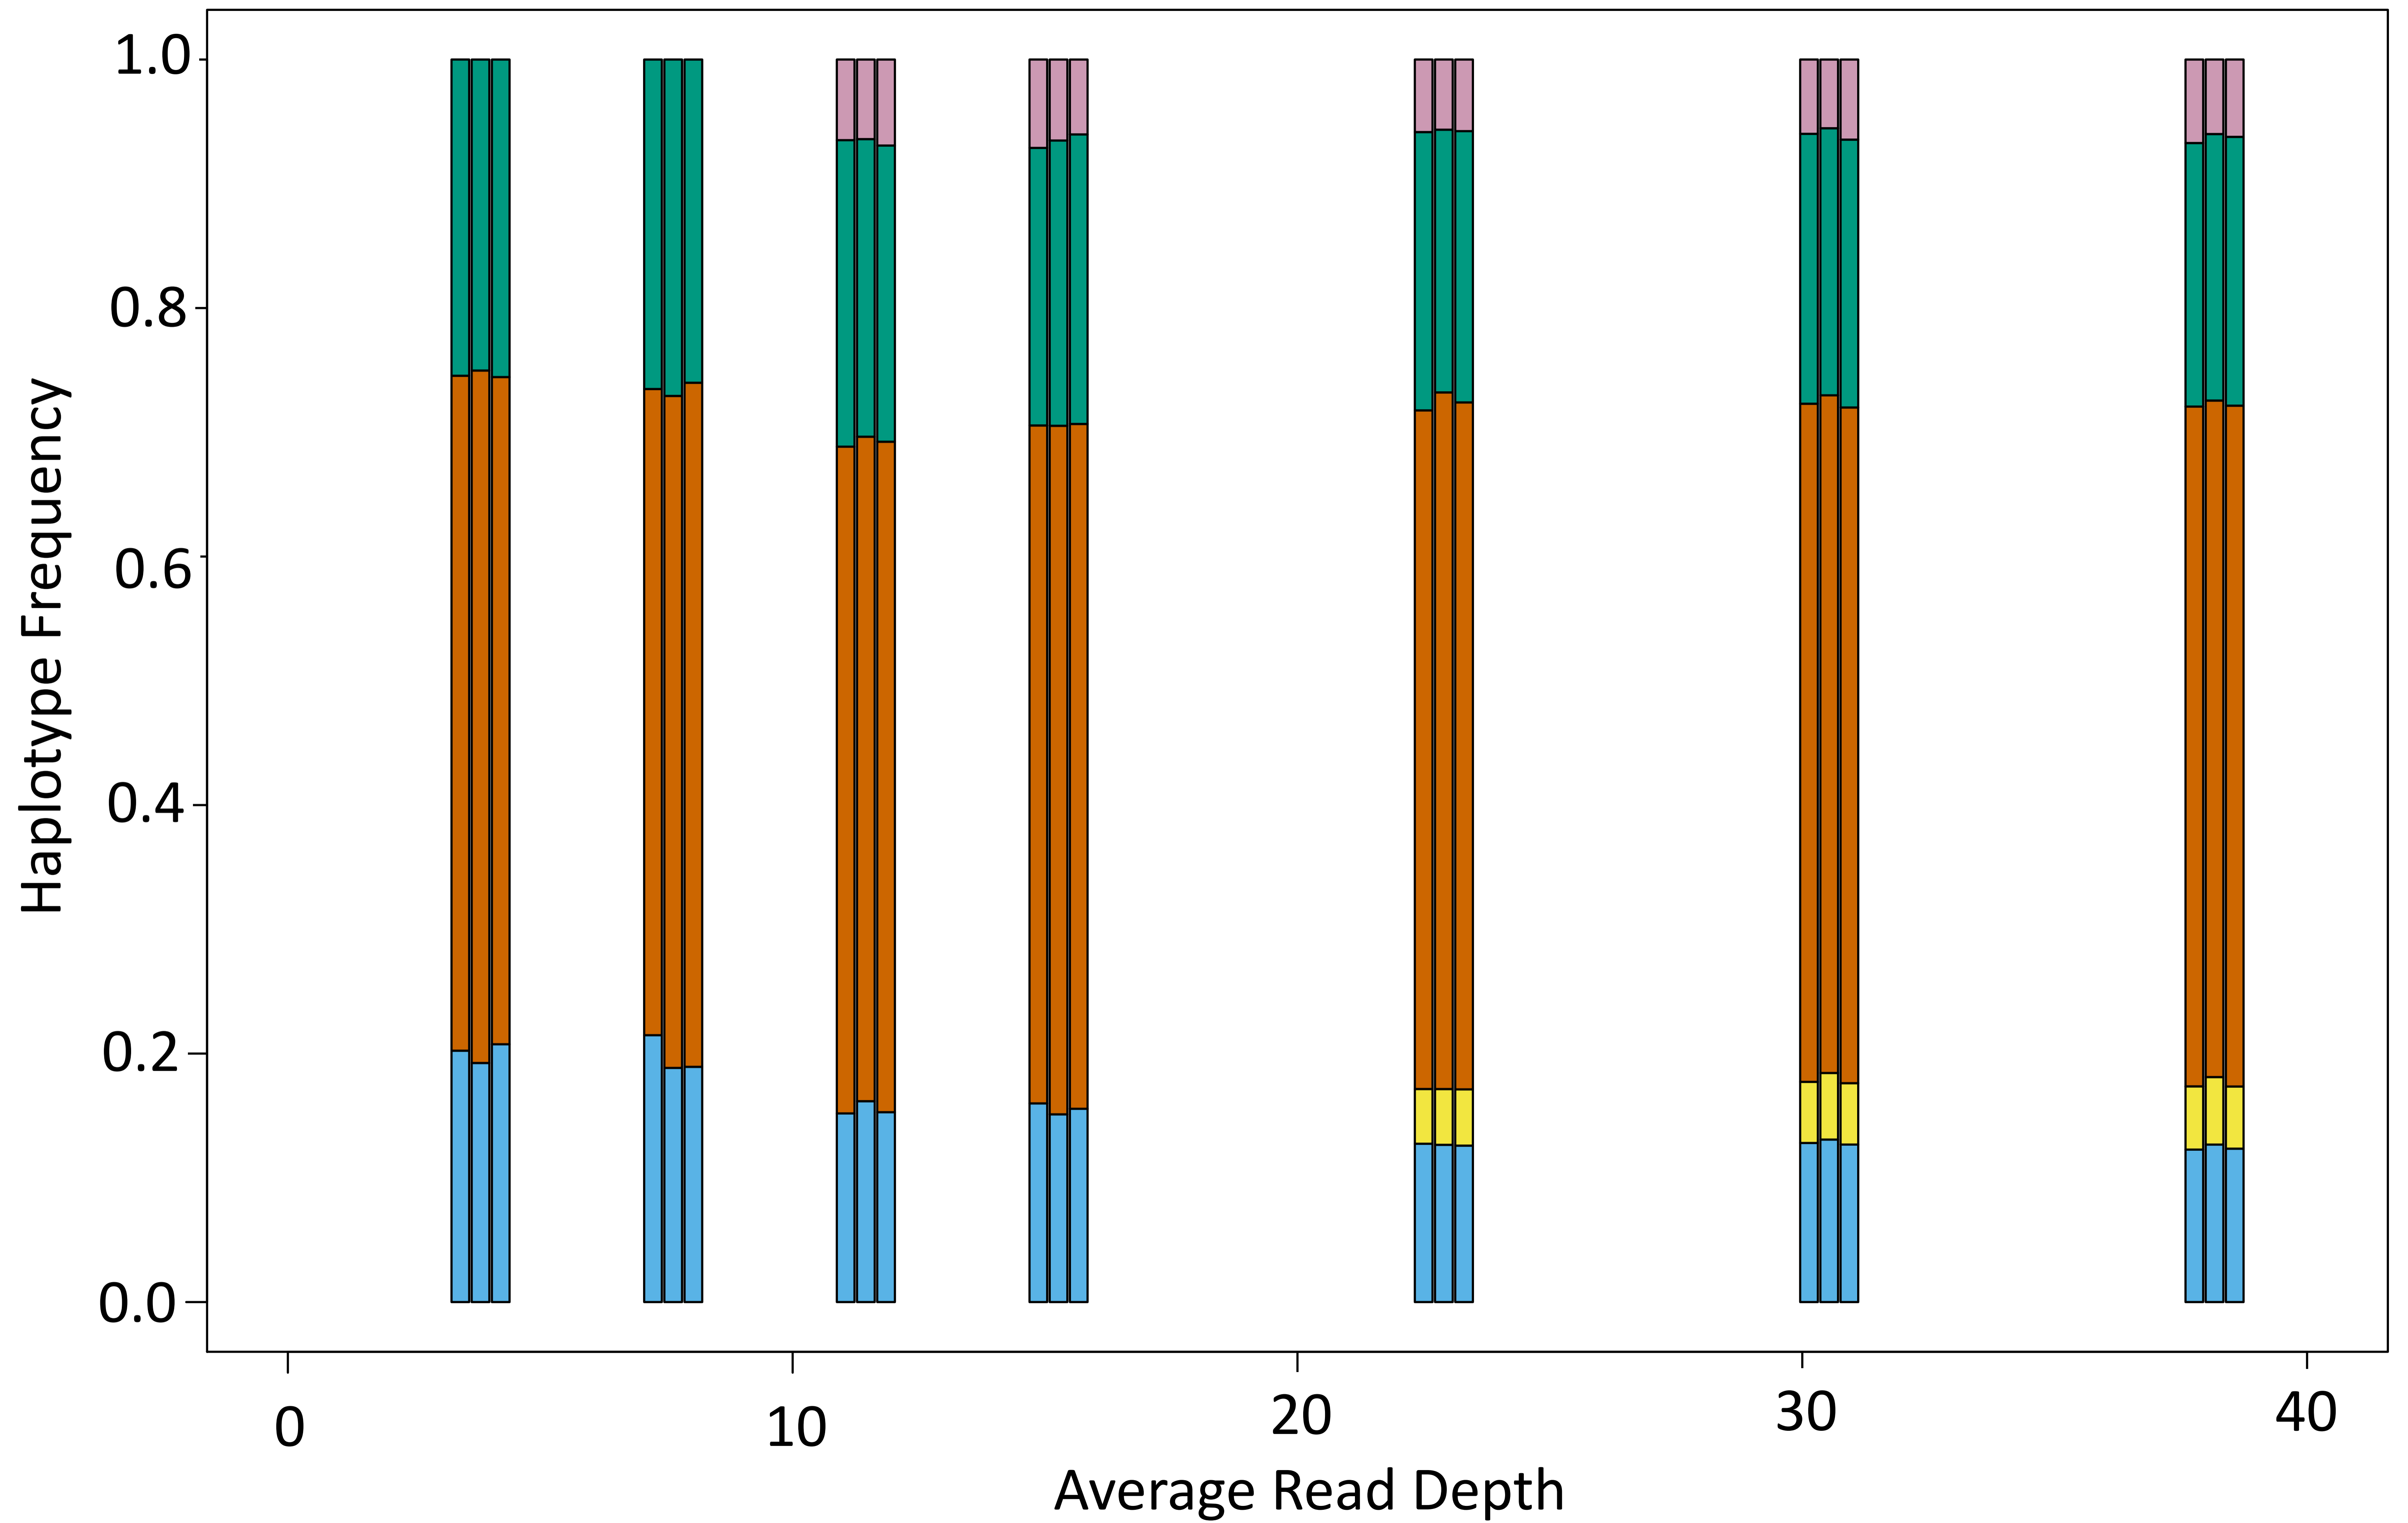

Supplement: supp [file elife-63199-supp-v1.zip › elife_poa_e63199_Figure_4_figure_supplement_1.pdf]

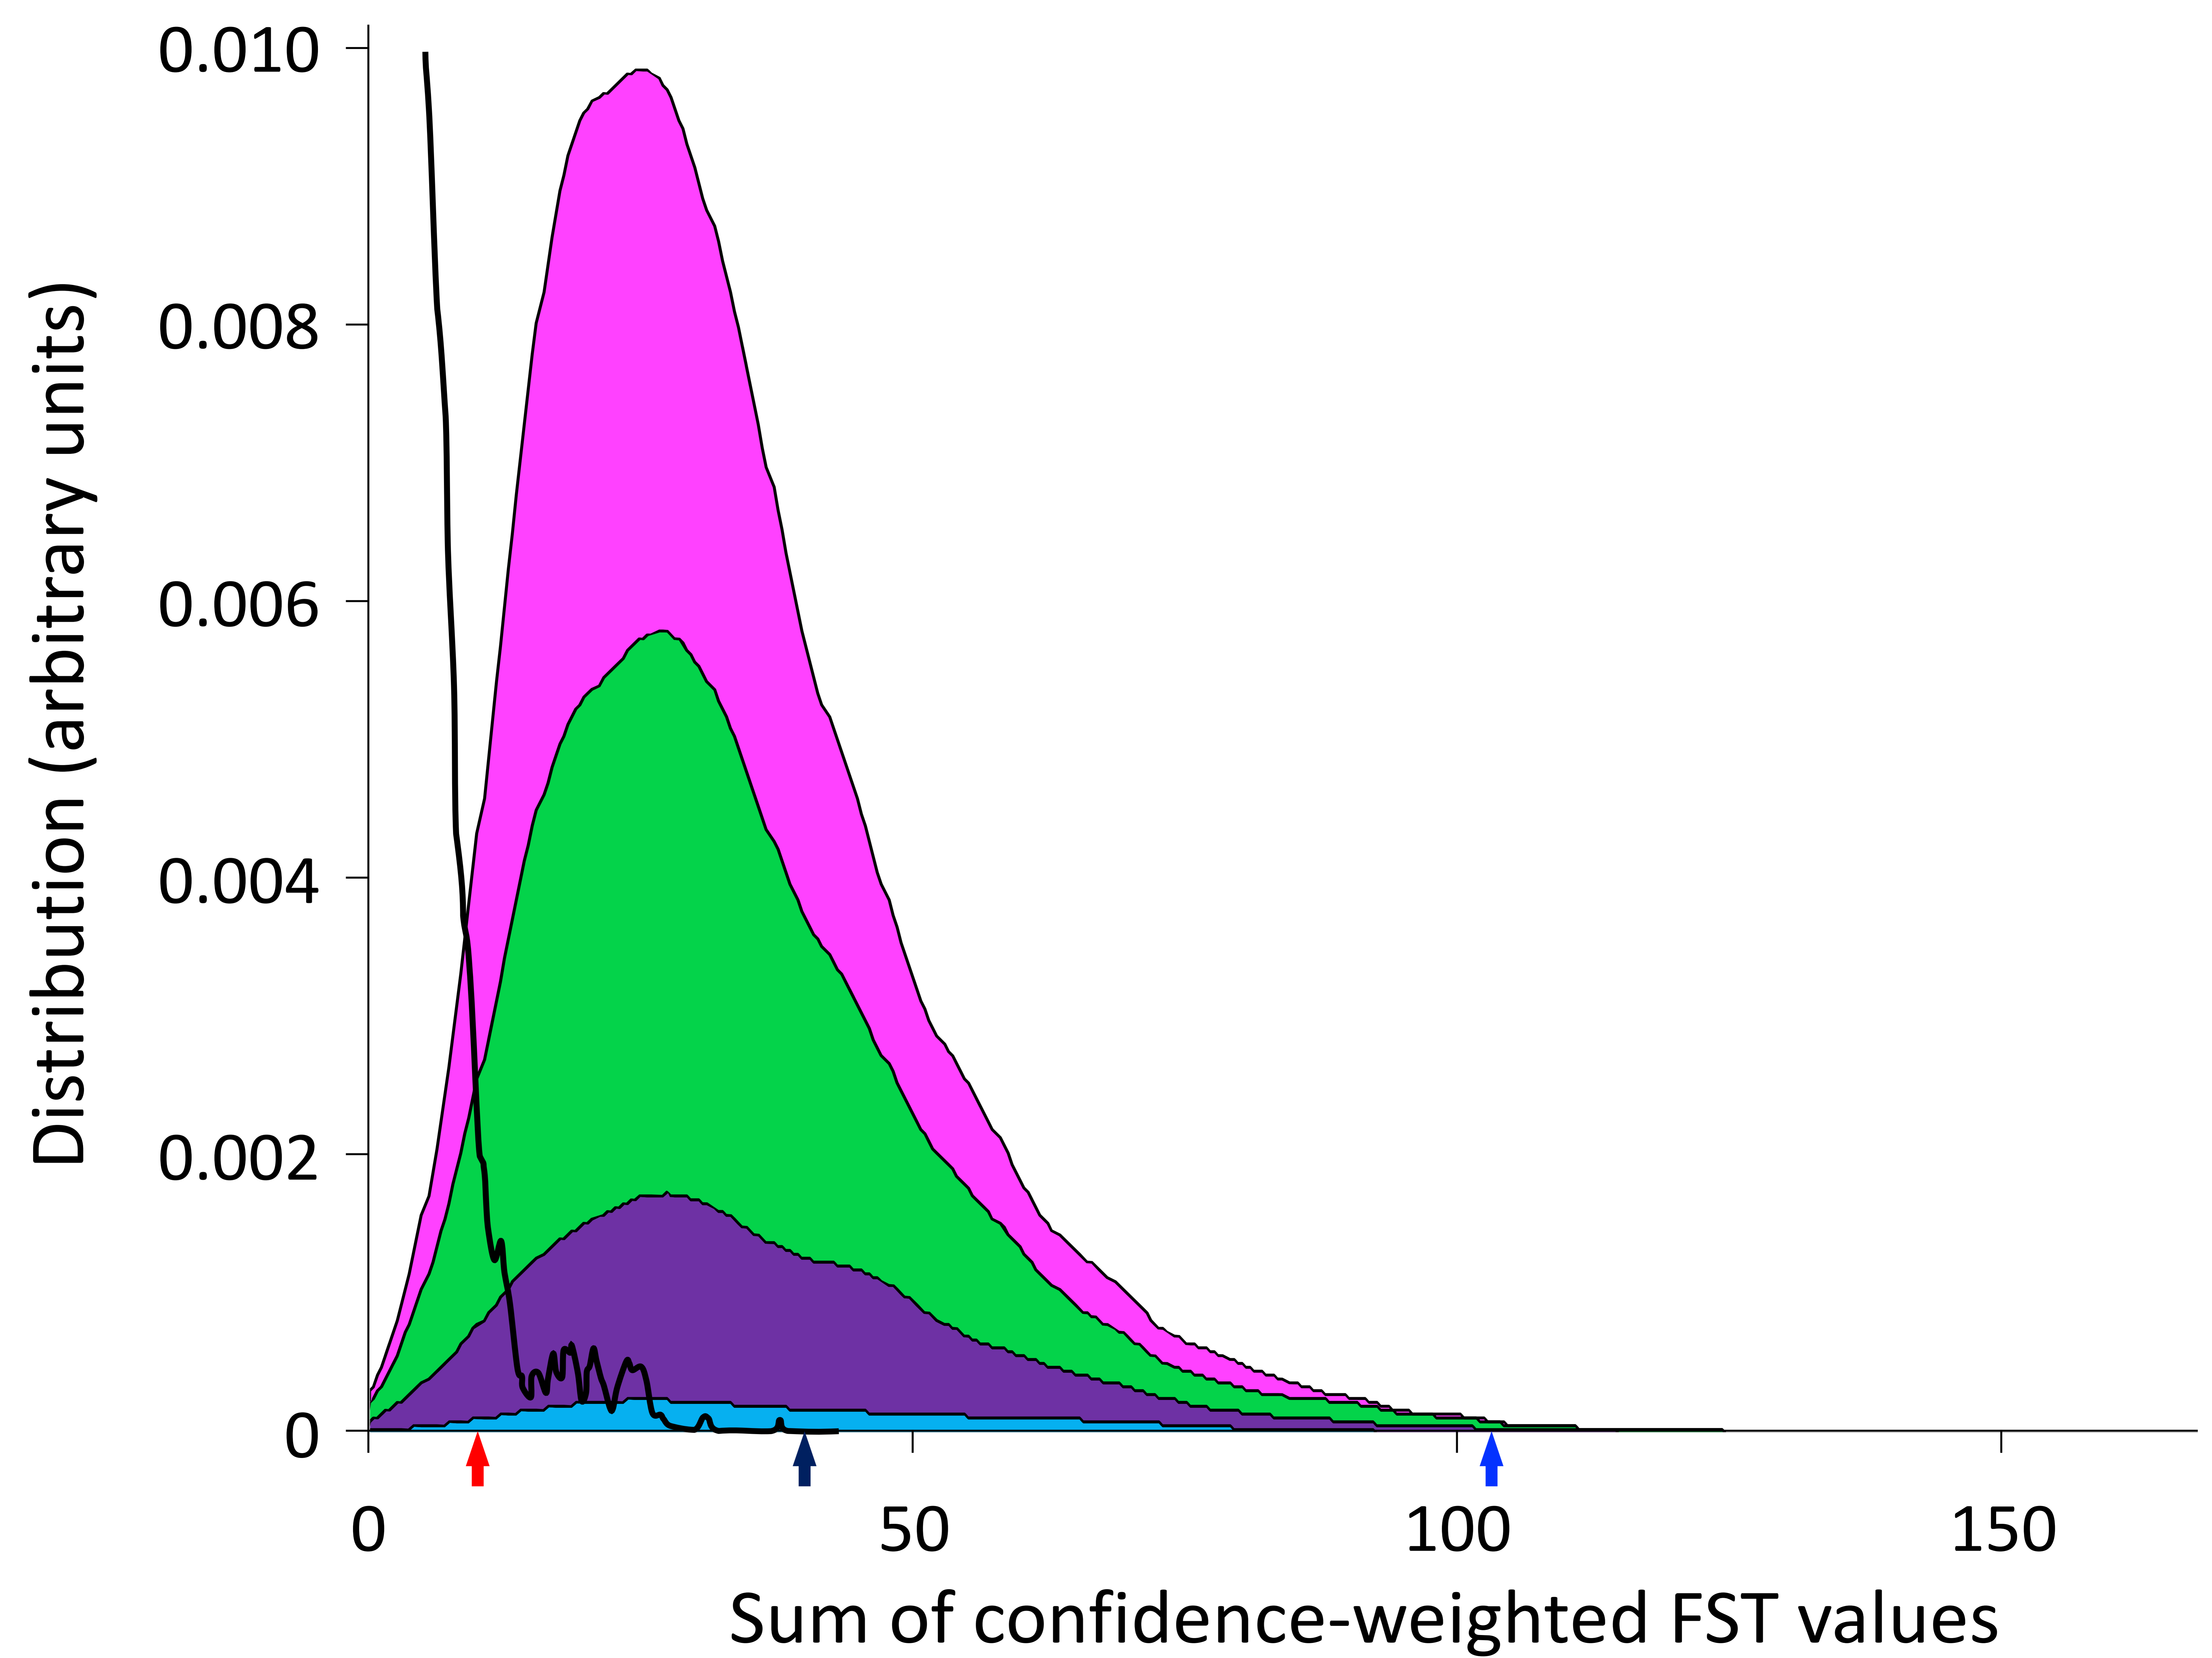

Supplement: supp [file elife-63199-supp-v1.zip › elife_poa_e63199_Figure_5_figure_supplement_1.pdf]

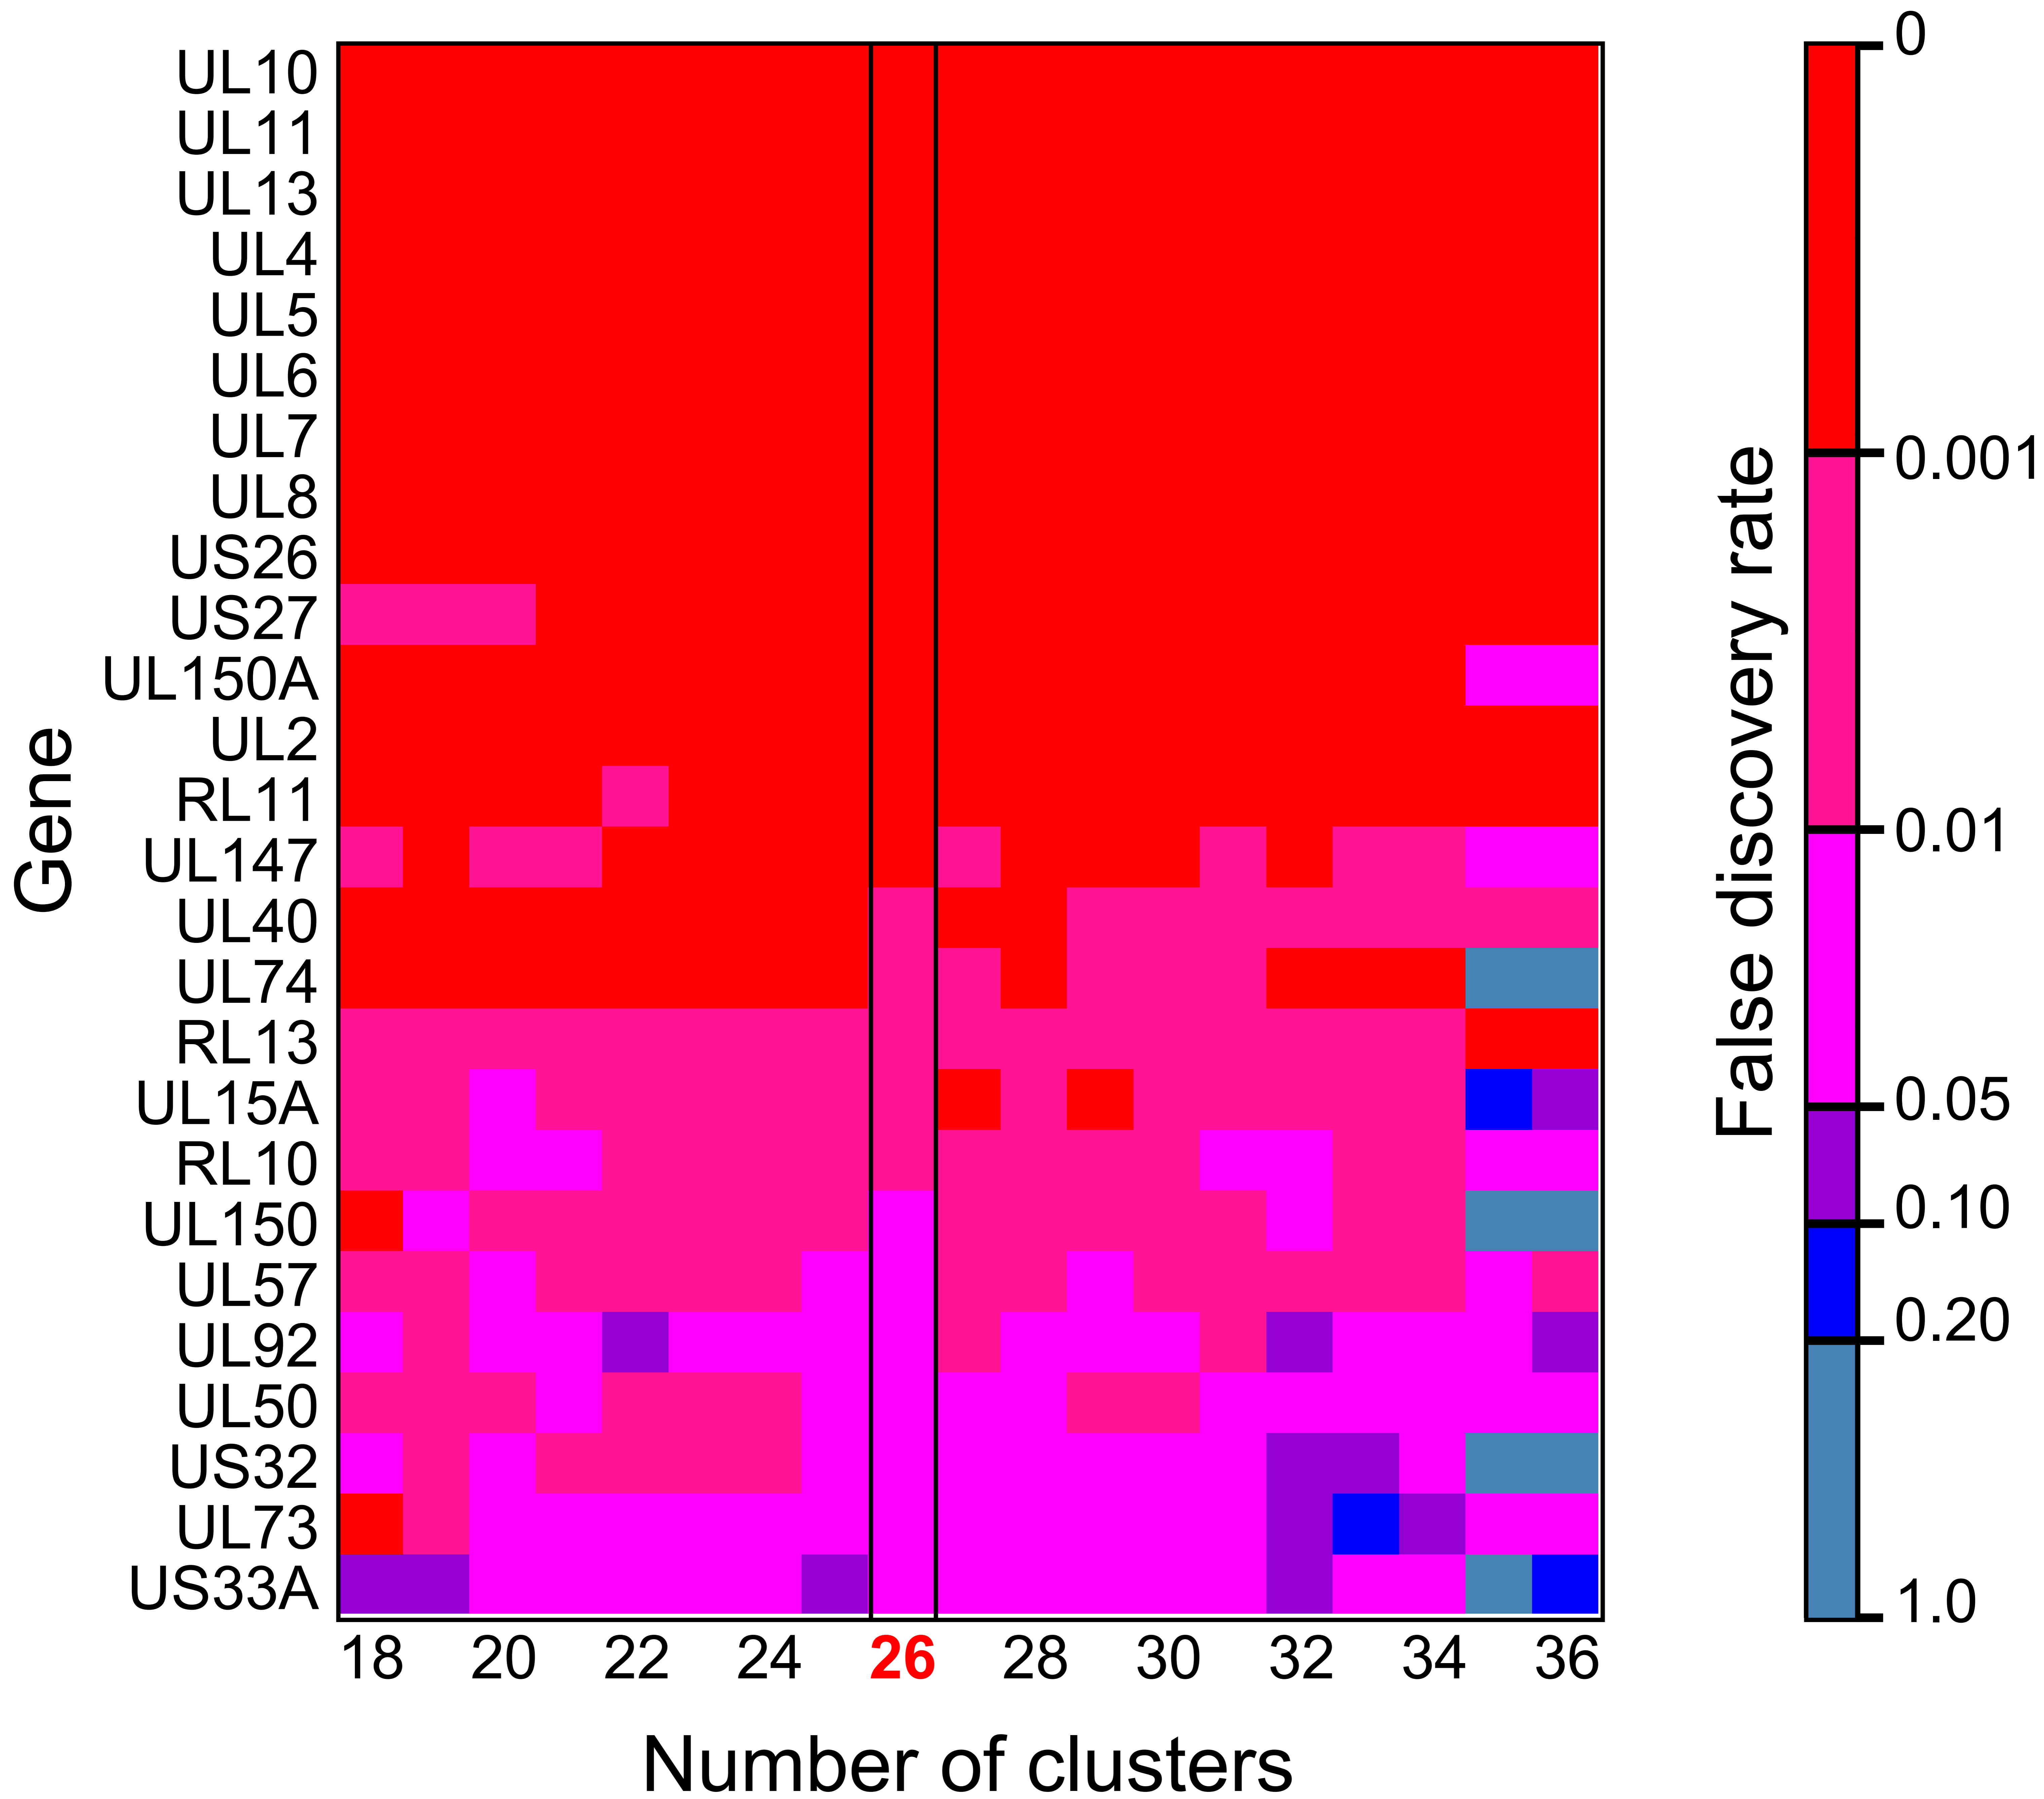

Supplement: supp [file elife-63199-supp-v1.zip › elife_poa_e63199_Figure_5_figure_supplement_2.pdf]
